# Supplementary material for: Impacts of Puppy Early Life Experiences, Puppy-Purchasing Practices, and Owner Characteristics on Owner-Reported Problem Behaviours in a UK Pandemic Puppies Cohort at 21 Months of Age
Source: MDPI journal article supplement (doi:10.3390/ani14020336), 2024-01-22
Supplement: s1 [file s1]

## File S2:

### Supplementary Table S1: Predictive variables used for univariable analysis

**Table S1. Variables used for univariable analysis.**

Variables used for univariable analysis of the outcomes of (i) total number of problem behaviours per dog; (ii) SRB case; (iii) training methods used; owner expectations for (iv) behaviour and (v) training, and (vi) owner sources of advice for general behaviour and training queries †Categorical variable, binary. ‡Categorical variable, more than two categories. \*Continuous variable. •Responses from the 2020 survey of “I’m not sure”, “I can’t/don’t remember” or “No, not as yet but I plan to before my dog is 16 weeks old (if applicable)” recoded as missing data.

|                                                                  | Variable                                                        | Survey derived from      | Outcome(s) Tested                      |
|------------------------------------------------------------------|-----------------------------------------------------------------|--------------------------|----------------------------------------|
| <b>Owner/household demographics</b>                              | †First-time dog owner, binary                                   | 2020                     | All                                    |
|                                                                  | ‡Owner age                                                      | 2020                     | All                                    |
|                                                                  | †Owner gender                                                   | 2020                     | All                                    |
|                                                                  | †Child ≤ 16 years in household                                  | 2020                     | All                                    |
|                                                                  | †•Employed in animal care/veterinary sector                     | 2020                     | All                                    |
|                                                                  | †Another dog(s) in household                                    | 2020                     | All                                    |
|                                                                  | ‡Current working location of owner                              | 21 months                | All                                    |
|                                                                  | ‡Current working location of other household members            | 21 months                | All                                    |
|                                                                  | †Owner lives alone/only adult in the household                  | 2020                     | All                                    |
| <b>Dog demographics</b>                                          | †Dog sex                                                        | 2020                     | All                                    |
|                                                                  | †Neuter status                                                  | 2020, updated 21 months  | All                                    |
|                                                                  | ‡Breed purity categorisation                                    | 2020                     | All                                    |
|                                                                  | ‡Top 12 most common breeds at 21 months                         | 2020, analysed 21 months | All                                    |
|                                                                  | ‡UK Kennel Club breed group                                     | 2020                     | All                                    |
|                                                                  | ‡Typical adult bodyweight categorisation                        | 2020                     | All                                    |
|                                                                  | †Insurance status                                               | 2020, updated 21 months  | Advice source                          |
| <b>Purchase motivations for a dog/breed or crossbreed chosen</b> | †Dog to improve mental health                                   | 2020                     | All except problem behaviours and SRBs |
|                                                                  | †Breed/crossbreed size suited to owner’s lifestyle              | 2020                     | All except problem behaviours and SRBs |
|                                                                  | †Breed/crossbreed good with children                            | 2020                     | All except problem behaviours and SRBs |
|                                                                  | †Breed/crossbreed easy to train                                 | 2020                     | All except problem behaviours and SRBs |
|                                                                  | †Friends or family own this breed/crossbreed                    | 2020                     | All except problem behaviours and SRBs |
|                                                                  | †Owner was driving force to get a dog                           | 2020                     | All except problem behaviours and SRBs |
|                                                                  | †Owner had more time to care for a dog due to COVID-19 pandemic | 2020                     | All except problem behaviours and SRBs |

Table S1. Contd.

|                                             | Variable                                             | Survey derived from     | Outcome(s) Tested                      |
|---------------------------------------------|------------------------------------------------------|-------------------------|----------------------------------------|
| <b>Pre-purchase research</b>                | †Research conducted                                  | 2020                    | All except problem behaviours and SRBs |
| <b>Purchase behaviours</b>                  | †Via animal-specific selling website                 | 2020                    | All                                    |
|                                             | †Viewed in person prior to purchase                  | 2020                    | All                                    |
| <b>Potentially illegal sales indicators</b> | †•Sold without dam present                           | 2020                    | All                                    |
|                                             | †Sold outside breeders' home                         | 2020                    | All                                    |
|                                             | †•Sold without a microchip                           | 2020                    | All                                    |
|                                             | †•Sold < 6 weeks of age                              | 2020                    | All                                    |
|                                             | †•Sold with passport < 13 weeks of age               | 2020                    | All                                    |
| <b>Owner expectations</b>                   | †Behaviour                                           | 21 months               | Advice source and training methods     |
|                                             | †Training                                            | 21 months               | Advice source and training methods     |
| <b>Socialisation &lt; 16 weeks</b>          | ‡•Attended puppy classes                             | 2020, updated 21 months | All                                    |
|                                             | †•Met any people from outside their household        | 2020                    | Problem behaviours                     |
|                                             | †•Had visitors to their home                         | 2020                    | Problem behaviours                     |
|                                             | †•Walked in a public space                           | 2020                    | Problem behaviours                     |
|                                             | †•Walked near traffic                                | 2020                    | Problem behaviours                     |
| <b>Socialisation &lt; 16 weeks</b>          | †•Met any dogs from outside their household          | 2020                    | Problem behaviours                     |
|                                             | †•Heard fireworks                                    | 2020                    | Problem behaviours                     |
|                                             | †•Heard thunderstorm(s)                              | 2020                    | Problem behaviours                     |
|                                             | †•Visited a dog groomer                              | 2020                    | Problem behaviours                     |
|                                             | †•Deliberately left at home alone                    | 2020                    | Problem behaviours and SRBs            |
| <b>Adult management</b>                     | ‡Attended adult classes                              | 21 months               | All                                    |
|                                             | ‡Owner training method                               | 21 months               | All except training methods            |
|                                             | ‡Owner response to SRB                               | 21 months               | SRBs                                   |
|                                             | ‡Exercise frequency (walks)                          | 21 months               | All except advice source               |
|                                             | ‡Exercise frequency (off lead)                       | 21 months               | All except advice source               |
|                                             | ‡Time left alone                                     | 21 months               | All except advice source               |
|                                             | ‡Change in time left alone from <16 weeks            | 21 months               | All                                    |
|                                             | ‡Location left alone                                 | 21 months               | All except advice source               |
|                                             | †General source of advice for training and behaviour | 21 months               | All except advice source               |
|                                             | †Respondent is primary carer for dog                 | 2020                    | Training methods and expectations      |

**Table S1.**        **Contd.**

|                      | <b>Variable</b>                                       | <b>Survey derived from</b> | <b>Outcome(s) Tested</b>               |
|----------------------|-------------------------------------------------------|----------------------------|----------------------------------------|
| <b>Dog behaviour</b> | *Total number of 'problem behaviours'                 | 21 months                  | All except problem behaviours          |
|                      | †Number of 'control behaviours'                       | 21 months                  | All except problem behaviours          |
|                      | †Number of 'attention-seeking behaviours'             | 21 months                  | All except problem behaviours          |
|                      | †Number of 'aggressive behaviours'                    | 21 months                  | All except problem behaviours          |
|                      | †Number of 'fear/avoidance behaviours'                | 21 months                  | All except problem behaviours          |
|                      | †Number of 'reaction to familiar people' behaviours   | 21 months                  | All except problem behaviours          |
|                      | †Number of 'reaction to unfamiliar people' behaviours | 21 months                  | All except problem behaviours          |
|                      | †Number of 'reaction to dogs' behaviours              | 21 months                  | All except problem behaviours          |
|                      | †SRB case                                             | 21 months                  | All except problem behaviours and SRBs |

## Supplementary Table S2: Total number of owner-reported problem behaviours, univariable analysis

**Table S2.** Descriptive and univariable analysis of total number of owner-reported problem behaviours at 21 months.

Descriptive and univariable analysis (Mann-Whitney *U* or Kruskal-Wallis test as appropriate) of the total number of commonly reported problem behaviours per dog with no missing data based upon responses to the question “At any point since the last survey (in November/December 2020) have you considered that your dog has a problem with the following behaviours? Please select all options that apply.”. Owners who had answered “I’m not sure” were reclassified as missing data. Three behaviours from qualitative content analysis of free-text responses were included used along with a common separation-related behaviour which was only displayed in the presence of the owner and not the absence. Significant results are emboldened.

|                                                         |                                                             |             |      |             |             | Statistics |                       |                 |
|---------------------------------------------------------|-------------------------------------------------------------|-------------|------|-------------|-------------|------------|-----------------------|-----------------|
|                                                         | Variable                                                    | Category    | %    | Median*     | IQR         | <i>U</i>   | <i>χ</i> <sup>2</sup> | <i>p</i> -Value |
| Owner/household demographics                            | First-time dog owner ( <i>n</i> = 787)                      | Yes         | 39.1 | 5.00        | 3.00 – 7.00 | 64425.000  | N/A                   | <b>0.003</b>    |
|                                                         |                                                             | No          | 60.9 | 4.00        | 3.00 – 7.00 |            |                       |                 |
|                                                         | Owner age ( <i>n</i> = 787)                                 | 18-24 years | 4.5  | 5.00        | 2.00 – 8.00 | N/A        | 3.052                 | 0.802           |
|                                                         |                                                             | 25-34 years | 19.4 | 5.00        | 3.00 – 7.00 |            |                       |                 |
|                                                         |                                                             | 35-44 years | 19.4 | 4.00        | 3.00 – 6.00 |            |                       |                 |
|                                                         |                                                             | 45-54 years | 28.1 | 5.00        | 3.00 – 7.00 |            |                       |                 |
|                                                         |                                                             | 55-64 years | 18.2 | 5.00        | 3.00 – 7.00 |            |                       |                 |
|                                                         |                                                             | 65-74 years | 9.3  | 5.00        | 3.00 – 7.00 |            |                       |                 |
|                                                         |                                                             | ≥ 75 years  | 1.1  | 4.00        | 3.50 – 6.50 |            |                       |                 |
|                                                         | Owner gender ( <i>n</i> = 787)                              | Female      | 91.1 | 5.00        | 3.00 – 7.00 | 25746.500  | N/A                   | 0.718           |
|                                                         |                                                             | Male        | 8.9  | 5.00        | 2.75 – 7.00 |            |                       |                 |
|                                                         | Child ≤ 16 years in household (in 2020) ( <i>n</i> = 787)   | No          | 73.1 | 5.00        | 3.00 – 7.00 | 58201.500  | N/A                   | 0.329           |
|                                                         |                                                             | Yes         | 26.9 | 4.00        | 3.00 – 6.00 |            |                       |                 |
|                                                         | Employed in animal care/veterinary sector ( <i>n</i> = 788) | No          | 92.4 | 5.00        | 3.00 – 7.00 | 17230.000  | N/A                   | <b>0.006</b>    |
|                                                         |                                                             | Yes         | 7.6  | 4.00        | 2.00 – 6.00 |            |                       |                 |
| Another dog(s) in household (in 2020) ( <i>n</i> = 788) | No                                                          | 72.6        | 5.00 | 3.00 – 7.00 | 50486.500   | N/A        | < <b>0.001</b>        |                 |
|                                                         | Yes                                                         | 27.4        | 4.00 | 2.00 – 6.00 |             |            |                       |                 |

\*Median number of total owner-reported problem behaviours.

Table S2. Contd...

|                              | Variable                                                              | Category                          | %    | Median* | IQR          | Statistics |          |                 |
|------------------------------|-----------------------------------------------------------------------|-----------------------------------|------|---------|--------------|------------|----------|-----------------|
|                              |                                                                       |                                   |      |         |              | <i>U</i>   | $\chi^2$ | <i>p</i> -Value |
| Owner/household demographics | Current working location of owner ( <i>n</i> = 774)                   | At home                           | 23.4 | 5.00    | 3.00 – 7.00  | N/A        | 2.880    | 0.578           |
|                              |                                                                       | Away from home                    | 20.9 | 5.00    | 3.00 – 7.00  |            |          |                 |
|                              |                                                                       | At and away from home             | 31.9 | 4.00    | 3.00 – 7.00  |            |          |                 |
|                              |                                                                       | Unemployed                        | 3.6  | 5.00    | 3.00 – 8.00  |            |          |                 |
|                              |                                                                       | Retired                           | 20.2 | 4.00    | 3.00 – 6.00  |            |          |                 |
|                              | Current working location of other household members ( <i>n</i> = 675) | At home                           | 19.0 | 5.00    | 3.00 – 6.00  | N/A        | 5.347    | 0.254           |
|                              |                                                                       | Away from home                    | 32.7 | 4.00    | 3.00 – 7.00  |            |          |                 |
|                              |                                                                       | At and away from home             | 31.4 | 5.00    | 3.00 – 7.00  |            |          |                 |
|                              |                                                                       | Unemployed                        | 1.5  | 6.50    | 3.75 – 10.00 |            |          |                 |
|                              |                                                                       | Retired                           | 15.4 | 4.00    | 3.00 – 6.00  |            |          |                 |
|                              | Owner lives alone/only adult in the household ( <i>n</i> = 774)       | No                                | 86.6 | 5.00    | 3.00 – 7.00  | 33646.000  | N/A      | 0.571           |
|                              |                                                                       | Yes                               | 13.4 | 4.00    | 3.00 – 7.00  |            |          |                 |
| Dog demographics             | Dog sex ( <i>n</i> = 787)                                             | Female                            | 46.9 | 4.00    | 3.00 – 7.00  | 69176.000  | N/A      | <b>0.012</b>    |
|                              |                                                                       | Male                              | 53.1 | 5.00    | 3.00 – 7.00  |            |          |                 |
|                              | Neutered ( <i>n</i> = 788)                                            | No                                | 40.9 | 4.00    | 2.00 – 6.00  | 86871.000  | N/A      | < <b>0.001</b>  |
|                              |                                                                       | Yes                               | 59.1 | 5.00    | 3.00 – 7.00  |            |          |                 |
|                              | Breed purity designation ( <i>n</i> = 788)                            | Crossbred                         | 4.3  | 5.00    | 4.00 – 8.00  | N/A        | 10.889   | <b>0.004</b>    |
|                              |                                                                       | Purebred                          | 68.5 | 4.00    | 3.00 – 7.00  |            |          |                 |
|                              |                                                                       | Designer Crossbred                | 27.2 | 5.00    | 3.00 – 7.00  |            |          |                 |
|                              | Top 12 most common breeds at 21 months ( <i>n</i> = 788)              | Crossbred                         | 4.3  | 5.00    | 4.00 – 8.00  | N/A        | 30.130   | <b>0.003</b>    |
|                              |                                                                       | Cockapoo                          | 9.9  | 5.00    | 4.00 – 8.00  |            |          |                 |
|                              |                                                                       | Labradoodle                       | 2.8  | 5.50    | 3.00 – 8.25  |            |          |                 |
|                              |                                                                       | Cavapoo                           | 1.9  | 6.00    | 4.00 – 8.00  |            |          |                 |
|                              |                                                                       | Labrador Retriever                | 10.3 | 4.00    | 2.00 – 6.00  |            |          |                 |
|                              |                                                                       | Cocker Spaniel                    | 6.9  | 5.00    | 3.00 – 7.00  |            |          |                 |
|                              |                                                                       | Border Collie                     | 3.4  | 5.00    | 4.00 – 8.00  |            |          |                 |
|                              |                                                                       | Miniature Smooth-Haired Dachshund | 2.8  | 5.50    | 2.75 – 9.25  |            |          |                 |
|                              |                                                                       | Border Terrier                    | 2.9  | 4.00    | 3.00 – 6.00  |            |          |                 |
|                              |                                                                       | Golden Retriever                  | 2.9  | 4.00    | 2.00 – 6.00  |            |          |                 |
|                              |                                                                       | Whippet                           | 2.4  | 4.00    | 2.00 – 7.00  |            |          |                 |
|                              |                                                                       | English Springer Spaniel          | 2.0  | 3.00    | 2.25 – 4.00  |            |          |                 |
|                              |                                                                       | Other                             | 47.5 | 4.50    | 3.00 – 7.00  |            |          |                 |

\*Median number of total owner-reported problem behaviours.

Table S2. Contd...

|                                      |                                                        | Category          | %    | Median* | IQR          | Statistics |          |                 |
|--------------------------------------|--------------------------------------------------------|-------------------|------|---------|--------------|------------|----------|-----------------|
| Variable                             |                                                        |                   |      |         |              | <i>U</i>   | $\chi^2$ | <i>p</i> -Value |
| Dog demographics                     | Breed group ( <i>n</i> = 788)                          | Not KC recognised | 32.3 | 5.00    | 3.00 – 7.00  | N/A        | 24.579   | < 0.001         |
|                                      |                                                        | Gundog            | 28.7 | 4.00    | 2.00 – 6.00  |            |          |                 |
|                                      |                                                        | Hound             | 9.3  | 5.00    | 3.00 – 8.00  |            |          |                 |
|                                      |                                                        | Pastoral          | 7.1  | 5.00    | 3.00 – 8.00  |            |          |                 |
|                                      |                                                        | Terrier           | 8.6  | 5.00    | 3.00 – 6.75  |            |          |                 |
|                                      |                                                        | Toy               | 3.0  | 5.50    | 3.25 – 6.75  |            |          |                 |
|                                      |                                                        | Utility           | 6.9  | 4.00    | 2.75 – 6.25  |            |          |                 |
|                                      |                                                        | Working           | 4.1  | 3.50    | 2.00 – 6.75  |            |          |                 |
|                                      | Typical adult bodyweight ( <i>n</i> = 756)             | ≤ 10 kg           | 19.2 | 5.00    | 3.00 – 7.00  | N/A        | 12.679   | 0.013           |
|                                      |                                                        | 10 to < 20 kg     | 41.1 | 5.00    | 3.00 – 7.00  |            |          |                 |
|                                      |                                                        | 20 to < 30 kg     | 22.8 | 4.00    | 2.25 – 6.00  |            |          |                 |
|                                      |                                                        | 30 to < 40 kg     | 15.2 | 4.00    | 2.00 – 6.00  |            |          |                 |
|                                      |                                                        | ≥ 40 kg           | 1.7  | 4.00    | 2.00 – 10.00 |            |          |                 |
| Purchase behaviours                  | Via animal-specific selling website ( <i>n</i> = 787)  | No                | 48.8 | 4.00    | 3.00 – 6.00  | 84928.000  | N/A      | 0.017           |
|                                      |                                                        | Yes               | 51.2 | 5.00    | 3.00 – 7.00  |            |          |                 |
|                                      | Viewed in person prior to purchase ( <i>n</i> = 788)   | No                | 29.3 | 5.00    | 3.00 – 7.00  | 61852.500  | N/A      | 0.391           |
|                                      |                                                        | Yes               | 70.7 | 5.00    | 3.00 – 7.00  |            |          |                 |
| Potentially illegal sales indicators | Sold without dam present ( <i>n</i> = 786)             | No                | 22.1 | 4.00    | 3.00 – 7.00  | 48907.500  | N/A      | 0.099           |
|                                      |                                                        | Yes               | 77.9 | 5.00    | 3.00 – 7.00  |            |          |                 |
|                                      | Sold outside breeders' home ( <i>n</i> = 788)          | No                | 63.2 | 5.00    | 3.00 – 7.00  | 70680.500  | N/A      | 0.618           |
|                                      |                                                        | Yes               | 36.8 | 5.00    | 3.00 – 7.00  |            |          |                 |
|                                      | Sold without a microchip ( <i>n</i> = 772)             | No                | 95.7 | 5.00    | 3.00 – 7.00  | 10495.000  | N/A      | 0.173           |
|                                      |                                                        | Yes               | 4.3  | 6.00    | 3.50 – 8.00  |            |          |                 |
|                                      | Sold < 6 weeks of age ( <i>n</i> = 787)                | No                | 99.7 | 5.00    | 3.00 – 7.00  | 1030.000   | N/A      | 0.443           |
|                                      |                                                        | Yes               | 0.3  | 6.50    | 4.00 – 9.00  |            |          |                 |
|                                      | Sold with passport < 13 weeks of age ( <i>n</i> = 714) | No                | 94.5 | 5.00    | 3.00 – 7.00  | 11786.500  | N/A      | 0.269           |
|                                      |                                                        | Yes               | 5.5  | 4.00    | 2.00 – 7.00  |            |          |                 |

\*Median number of total owner-reported problem behaviours.

Table S2. Contd...

|                                    | Variable                                                      | Category                     | %    | Median* | IQR         | Statistics |          |                 |
|------------------------------------|---------------------------------------------------------------|------------------------------|------|---------|-------------|------------|----------|-----------------|
|                                    |                                                               |                              |      |         |             | <i>U</i>   | $\chi^2$ | <i>p</i> -Value |
| <b>Socialisation &lt; 16 weeks</b> | Attended puppy classes ( <i>n</i> = 787)                      | No                           | 56.8 | 5.00    | 3.00 – 7.00 | N/A        | 0.398    | 0.820           |
|                                    |                                                               | Yes, in person               | 35.5 | 5.00    | 3.00 – 7.00 |            |          |                 |
|                                    |                                                               | Yes, online                  | 7.8  | 4.00    | 3.00 – 7.00 |            |          |                 |
|                                    | Met any people from outside their household ( <i>n</i> = 733) | No                           | 2.9  | 4.00    | 1.00 – 7.50 | 8090.500   | N/A      | 0.518           |
|                                    |                                                               | Yes                          | 97.1 | 5.00    | 3.00 – 7.00 |            |          |                 |
|                                    | Had visitors to their home ( <i>n</i> = 707)                  | No                           | 8.6  | 4.00    | 3.00 – 7.00 | 20412.000  | N/A      | 0.640           |
|                                    |                                                               | Yes                          | 91.4 | 5.00    | 3.00 – 7.00 |            |          |                 |
|                                    | Walked in a public space ( <i>n</i> = 623)                    | No                           | 8.3  | 6.00    | 3.25 – 8.00 | 12214.000  | N/A      | <b>0.033</b>    |
|                                    |                                                               | Yes                          | 91.7 | 5.00    | 3.00 – 7.00 |            |          |                 |
|                                    | Walked near traffic ( <i>n</i> = 637)                         | No                           | 9.1  | 5.00    | 3.00 – 8.00 | 15263.000  | N/A      | 0.250           |
|                                    |                                                               | Yes                          | 90.9 | 4.00    | 3.00 – 7.00 |            |          |                 |
|                                    | Met any dogs from outside their household ( <i>n</i> = 666)   | No                           | 11.4 | 4.00    | 2.25 – 7.75 | 23128.000  | N/A      | 0.652           |
|                                    |                                                               | Yes                          | 88.6 | 5.00    | 3.00 – 7.00 |            |          |                 |
|                                    | Fireworks ( <i>n</i> = 715)                                   | No                           | 39.2 | 5.00    | 3.00 – 7.00 | 60217.500  | N/A      | 0.799           |
|                                    |                                                               | Yes                          | 60.8 | 5.00    | 3.00 – 7.00 |            |          |                 |
|                                    | Thunderstorms ( <i>n</i> = 643)                               | No                           | 63.8 | 5.00    | 3.00 – 7.00 | 41007.500  | N/A      | <b>0.003</b>    |
|                                    |                                                               | Yes                          | 36.2 | 4.00    | 2.00 – 6.00 |            |          |                 |
|                                    | Dog groomer ( <i>n</i> = 652)                                 | No                           | 79.0 | 4.00    | 3.00 – 6.00 | 38854.000  | N/A      | 0.066           |
|                                    |                                                               | Yes                          | 21.0 | 5.00    | 3.00 – 7.00 |            |          |                 |
| <b>Adult management</b>            | Deliberately left at home alone ( <i>n</i> = 681)             | No                           | 15.9 | 5.00    | 3.00 – 8.00 | 26429.500  | N/A      | <b>0.016</b>    |
|                                    |                                                               | Yes                          | 84.1 | 4.00    | 3.00 – 6.00 |            |          |                 |
|                                    |                                                               |                              |      |         |             |            |          |                 |
|                                    | Attended adult classes ( <i>n</i> = 788)                      | No                           | 54.7 | 4.00    | 3.00 – 6.00 | N/A        | 7.421    | <b>0.024</b>    |
|                                    |                                                               | Yes, in person               | 41.6 | 5.00    | 3.00 – 7.00 |            |          |                 |
|                                    |                                                               | Yes, online                  | 3.7  | 5.00    | 3.00 – 8.50 |            |          |                 |
|                                    | Owner training method ( <i>n</i> = 762)                       | Rewards-based only           | 17.6 | 3.00    | 2.00 – 5.00 | N/A        | 38.081   | < <b>0.001</b>  |
|                                    |                                                               | Rewards-based & 1 aversive   | 20.3 | 5.00    | 3.00 – 6.00 |            |          |                 |
|                                    |                                                               | Rewards-based & > 1 aversive | 62.1 | 5.00    | 3.00 – 7.00 |            |          |                 |
|                                    |                                                               | Aversive only                | 0.0  | /       | /           |            |          |                 |

\*Median number of total owner-reported problem behaviours.

Table S2. Contd...

|                  |                                                                       | Category                            | %    | Median* | IQR          | Statistics |          |                 |
|------------------|-----------------------------------------------------------------------|-------------------------------------|------|---------|--------------|------------|----------|-----------------|
| Variable         |                                                                       |                                     |      |         |              | <i>U</i>   | $\chi^2$ | <i>p</i> -Value |
| Adult management | Exercise frequency (walks)<br>( <i>n</i> = 784)                       | Never                               | 0.1  | 4.00    | <i>n</i> = 1 | N/A        | 1.947    | 0.924           |
|                  |                                                                       | < Once a week                       | 0.3  | 4.00    | 0.00 – 8.00  |            |          |                 |
|                  |                                                                       | Once a week                         | 0.3  | 4.50    | 0.00 – 9.00  |            |          |                 |
|                  |                                                                       | Several times per week              | 5.5  | 5.00    | 3.00 – 8.00  |            |          |                 |
|                  |                                                                       | Once per day                        | 27.2 | 4.00    | 3.00 – 7.00  |            |          |                 |
|                  |                                                                       | Twice per day                       | 45.9 | 5.00    | 3.00 – 7.00  |            |          |                 |
|                  |                                                                       | > Twice per day                     | 20.8 | 4.00    | 3.00 – 7.00  |            |          |                 |
|                  | Exercise frequency (off lead)<br>( <i>n</i> = 782)                    | Never                               | 5.6  | 5.00    | 3.00 – 8.75  | N/A        | 22.435   | <b>0.001</b>    |
|                  |                                                                       | < Once a week                       | 3.2  | 6.00    | 3.50 – 9.50  |            |          |                 |
|                  |                                                                       | Once a week                         | 3.3  | 6.50    | 3.75 – 9.25  |            |          |                 |
|                  |                                                                       | Several times per week              | 16.0 | 5.00    | 3.00 – 8.00  |            |          |                 |
|                  |                                                                       | Once per day                        | 32.1 | 5.00    | 3.00 – 7.00  |            |          |                 |
|                  |                                                                       | Twice per day                       | 25.1 | 4.00    | 3.00 – 6.00  |            |          |                 |
|                  |                                                                       | > Twice per day                     | 14.7 | 4.00    | 2.00 – 6.00  |            |          |                 |
|                  | Time left alone ( <i>n</i> = 788)                                     | Never                               | 10.2 | 6.00    | 3.00 – 8.00  | N/A        | 7.835    | <b>0.050</b>    |
|                  |                                                                       | Up to 1 hour                        | 18.7 | 5.00    | 3.00 – 6.00  |            |          |                 |
|                  |                                                                       | 1 to 4 hours                        | 58.1 | 4.00    | 3.00 – 7.00  |            |          |                 |
|                  |                                                                       | Over 4 hours                        | 13.1 | 5.00    | 3.00 – 7.00  |            |          |                 |
|                  | Change in time left alone from<br>< 16 weeks ( <i>n</i> = 772)        | Same amount of time                 | 41.6 | 5.00    | 3.00 – 6.00  | N/A        | 4.899    | 0.179           |
|                  |                                                                       | Less time                           | 2.8  | 4.50    | 2.75 – 8.25  |            |          |                 |
|                  |                                                                       | More time ≤ 4 hours                 | 43.5 | 4.00    | 3.00 – 7.00  |            |          |                 |
|                  |                                                                       | More time > 4 hours                 | 12.0 | 5.00    | 3.00 – 8.00  |            |          |                 |
|                  | Location left alone<br>( <i>n</i> = 770)                              | A crate/indoor kennel (door closed) | 15.2 | 5.00    | 3.00 – 8.00  | N/A        | 6.573    | 0.254           |
|                  |                                                                       | Loose in a single room              | 28.2 | 5.00    | 3.00 – 7.00  |            |          |                 |
|                  |                                                                       | Loose in multiple rooms             | 56.2 | 4.00    | 3.00 – 7.00  |            |          |                 |
|                  |                                                                       | Outdoor kennel (door closed)        | 0.1  | /       | /            |            |          |                 |
|                  |                                                                       | Outdoor kennel (door open)          | 0.1  | /       | /            |            |          |                 |
|                  |                                                                       | Loose in an enclosed outdoor space  | 0.1  | /       | /            |            |          |                 |
|                  | General advice source for training<br>and behaviour ( <i>n</i> = 781) | Non-professional                    | 29.7 | 4.00    | 2.00 – 6.00  | 78581.500  | N/A      | < <b>0.001</b>  |
|                  |                                                                       | Professional                        | 70.3 | 5.00    | 3.00 – 7.00  |            |          |                 |

\*Median number of total owner-reported problem behaviours.



## Supplementary Table S3: Total number of owner-reported separation-related behaviours, univariable analysis

**Table S3.** Descriptive and univariable analysis of owner-reported separation-related behaviour cases at 21 months.

Descriptive and univariable binary logistic regression analysis of the binary categorisation of separation-related behaviour cases based upon nine commonly reported separation-related behaviours presented to owners. Dogs not displaying individual behaviour(s) in either context were coded as '0'; those who only displayed an individual behaviour(s) whilst left alone were coded as '1'. Dogs displaying individual behaviour(s) in both contexts were coded as '2', whilst those dogs only displaying individual behaviour(s) whilst relaxing were coded as '3'. To be coded as a 'case' at least one behaviour was a '1', any/all of the remaining behaviours could be a '2' or a '3'. \*95% confidence interval. Significant results are emboldened. ~ No analysis possible.

|                                     | Variable                                                       | Category              | <i>n</i> (not a case;<br>case) | % (case)    | Odds Ratio   | 95% CI*              | <i>p</i> -Value   |
|-------------------------------------|----------------------------------------------------------------|-----------------------|--------------------------------|-------------|--------------|----------------------|-------------------|
| Owner/<br>household<br>demographics | First-time dog owner<br>( <i>n</i> = 788)                      | No                    | 359; 125                       | 25.8        |              | Ref                  |                   |
|                                     |                                                                | Yes                   | <b>185; 119</b>                | <b>39.1</b> | <b>1.847</b> | <b>1.359 – 2.512</b> | <b>&lt; 0.001</b> |
|                                     | Owner age ( <i>n</i> = 788)                                    | 18-24 years           | 23; 13                         | 36.1        | 1.422        | 0.677 – 2.990        | 0.353             |
|                                     |                                                                | <b>25-34 years</b>    | <b>85; 65</b>                  | <b>43.3</b> | <b>1.925</b> | <b>1.239 – 2.989</b> | <b>0.004</b>      |
|                                     |                                                                | 35-44 years           | 103; 50                        | 32.7        | 1.222        | 0.778 – 1.918        | 0.384             |
|                                     |                                                                | 45-54 years           | 151; 60                        | 28.4        |              | Ref                  |                   |
|                                     |                                                                | 55-64 years           | 111; 39                        | 26.0        | 0.884        | 0.552 – 1.417        | 0.609             |
|                                     |                                                                | 65-74 years           | 64; 16                         | 20.0        | 0.629        | 0.337 – 1.174        | 0.146             |
|                                     |                                                                | ≥ 75 years            | 7; 1                           | 12.5        | 0.360        | 0.043 – 2.985        | 0.343             |
|                                     | Owner gender ( <i>n</i> = 789)                                 | Female                | 493; 223                       | 31.1        |              | Ref                  |                   |
|                                     |                                                                | Male                  | 52; 21                         | 28.8        | 0.893        | 0.525 – 1.518        | 0.675             |
|                                     | Child ≤ 16 years in household (in<br>2020) ( <i>n</i> = 788)   | No                    | 397; 174                       | 30.5        |              | Ref                  |                   |
|                                     |                                                                | Yes                   | 148; 69                        | 31.8        | 1.064        | 0.760 – 1.490        | 0.719             |
|                                     | Employed in animal<br>care/veterinary sector ( <i>n</i> = 789) | No                    | 505; 229                       | 31.2        |              | Ref                  |                   |
|                                     |                                                                | Yes                   | 40; 15                         | 27.3        | 0.827        | 0.448 – 1.527        | 0.544             |
|                                     | Another dog(s) in household (in<br>2020) ( <i>n</i> = 781)     | No                    | 361; 202                       | 35.9        |              | Ref                  |                   |
|                                     |                                                                | Yes                   | <b>177; 41</b>                 | <b>18.8</b> | <b>0.414</b> | <b>0.283 – 0.606</b> | <b>&lt; 0.001</b> |
|                                     | Current working location of owner<br>( <i>n</i> = 778)         | At home               | 116; 59                        | 33.7        | 0.893        | 0.595 – 1.341        | 0.585             |
|                                     |                                                                | Away from home        | 123; 46                        | 27.2        | 0.657        | 0.429 – 1.006        | 0.053             |
|                                     |                                                                | At and away from home | 158; 90                        | 36.3        |              | Ref                  |                   |
|                                     |                                                                | Unemployed            | 17; 9                          | 34.6        | 0.929        | 0.398 – 2.171        | 0.866             |
|                                     |                                                                | <b>Retired</b>        | <b>124; 36</b>                 | <b>22.5</b> | <b>0.510</b> | <b>0.324 – 0.801</b> | <b>0.004</b>      |

Table S3. Contd...

|                                              | Variable                                                         | Category                             | n (not a case;<br>case) | % (case)    | Odds Ratio   | 95% CI*              | p-Value      |
|----------------------------------------------|------------------------------------------------------------------|--------------------------------------|-------------------------|-------------|--------------|----------------------|--------------|
| <b>Owner/<br/>household<br/>demographics</b> | Current working location of other<br>household members (n = 674) | At home                              | 84; 42                  | 33.3        | 1.075        | 0.671 – 1.720        | 0.764        |
|                                              |                                                                  | Away from home                       | 147; 75                 | 33.8        | 1.097        | 0.734 – 1.639        | 0.653        |
|                                              |                                                                  | At and away from home                | 144; 67                 | 31.8        |              | Ref                  |              |
|                                              |                                                                  | Unemployed                           | 7; 3                    | 30.0        | 0.921        | 0.231 – 3.673        | 0.907        |
|                                              |                                                                  | <b>Retired</b>                       | <b>89; 16</b>           | <b>15.2</b> | <b>0.386</b> | <b>0.211 – 0.708</b> | <b>0.002</b> |
|                                              | Owner lives alone/only adult in the<br>household (n = 778)       | No                                   | 469; 201                | 30.0        |              | Ref                  |              |
|                                              |                                                                  | Yes                                  | 69; 39                  | 36.1        | 1.319        | 0.861 – 2.019        | 0.203        |
| <b>Dog<br/>demographics</b>                  | Dog sex (n = 788)                                                | Female                               | 263; 108                | 29.1        |              | Ref                  |              |
|                                              |                                                                  | Male                                 | 281; 136                | 32.6        | 1.179        | 0.870 – 1.596        | 0.289        |
|                                              | Neutered (n = 789)                                               | No                                   | 234; 89                 | 27.6        |              | Ref                  |              |
|                                              |                                                                  | Yes                                  | 311; 155                | 33.3        | 1.310        | 0.960 – 1.788        | 0.088        |
|                                              | Breed designation (n = 789)                                      | Crossbred                            | 24; 10                  | 29.4        |              | Ref                  |              |
|                                              |                                                                  | Purebred                             | 391; 153                | 28.1        | 0.939        | 0.439 – 2.010        | 0.872        |
|                                              |                                                                  | Designer Crossbred                   | 130; 81                 | 38.4        | 1.495        | 0.680 – 3.289        | 0.317        |
|                                              | Breed (n = 789)                                                  | Other Crossbred                      | 87; 45                  | 34.1        |              | Ref                  |              |
|                                              |                                                                  | Cockapoo                             | 45; 31                  | 40.8        | 1.332        | 0.744 – 2.384        | 0.335        |
|                                              |                                                                  | Labradoodle                          | 14; 9                   | 39.1        | 1.243        | 0.500 – 3.092        | 0.640        |
|                                              |                                                                  | Cavapoo                              | 8; 6                    | 42.9        | 1.450        | 0.474 – 4.435        | 0.515        |
|                                              |                                                                  | Labrador Retriever                   | 61; 22                  | 26.5        | 0.697        | 0.380 – 1.278        | 0.243        |
|                                              |                                                                  | Cocker Spaniel                       | 35; 21                  | 37.5        | 1.160        | 0.606 – 2.222        | 0.654        |
|                                              |                                                                  | Border Collie                        | 18; 11                  | 37.9        | 1.181        | 0.514 – 2.715        | 0.694        |
|                                              |                                                                  | Miniature Smooth-Haired<br>Dachshund | 18; 7                   | 28.0        | 0.752        | 0.292 – 1.933        | 0.554        |
|                                              |                                                                  | Border Terrier                       | 14; 7                   | 33.3        | 0.967        | 0.364 – 2.566        | 0.946        |
|                                              |                                                                  | Golden Retriever                     | 20; 5                   | 20.0        | 0.483        | 0.170 – 1.373        | 0.172        |
|                                              |                                                                  | Whippet                              | 12; 7                   | 36.8        | 1.128        | 0.415 – 3.063        | 0.814        |
|                                              |                                                                  | English Springer Spaniel             | 12; 6                   | 33.3        | 0.967        | 0.340 – 2.746        | 0.949        |
|                                              |                                                                  | Other Purebred                       | 201; 67                 | 25.0        | 0.644        | 0.409 – 1.015        | 0.058        |

Table S3. Contd...

|                                             | Variable                                       | Category                | n (not a case;<br>case) | % (case)    | Odds Ratio   | 95% CI*              | p-Value      |
|---------------------------------------------|------------------------------------------------|-------------------------|-------------------------|-------------|--------------|----------------------|--------------|
| <b>Dog demographics</b>                     | Breed group (n = 789)                          | Not KC recognised       | 161; 91                 | 36.1        |              | Ref                  |              |
|                                             |                                                | <b>Gundog</b>           | <b>169; 64</b>          | <b>27.5</b> | <b>0.670</b> | <b>0.456 – 0.985</b> | <b>0.042</b> |
|                                             |                                                | Hound                   | 49; 25                  | 33.8        | 0.903        | 0.523 – 1.558        | 0.713        |
|                                             |                                                | Pastoral                | 41; 17                  | 29.3        | 0.734        | 0.394 – 1.365        | 0.328        |
|                                             |                                                | Terrier                 | 47; 15                  | 24.2        | 0.565        | 0.299 – 1.066        | 0.078        |
|                                             |                                                | Toy                     | 14; 7                   | 33.3        | 0.885        | 0.345 – 2.271        | 0.799        |
|                                             |                                                | Utility                 | 42; 15                  | 26.3        | 0.632        | 0.332 – 1.202        | 0.162        |
|                                             |                                                | Working                 | 22; 10                  | 31.3        | 0.804        | 0.365 – 1.773        | 0.589        |
|                                             | Typical adult bodyweight (n = 758)             | ≤ 10 kg                 | 99; 41                  | 29.3        | 0.740        | 0.481 – 1.139        | 0.171        |
|                                             |                                                | 10 to < 20 kg           | 202; 113                | 35.9        |              | Ref                  |              |
|                                             |                                                | 20 to < 30 kg           | 126; 50                 | 28.4        | 0.709        | 0.475 – 1.059        | 0.093        |
|                                             |                                                | <b>30 to &lt; 40 kg</b> | <b>90; 24</b>           | <b>21.1</b> | <b>0.477</b> | <b>0.287 – 0.790</b> | <b>0.004</b> |
|                                             |                                                | ≥ 40 kg                 | 9; 4                    | 30.8        | 0.794        | 0.239 – 2.638        | 0.707        |
| <b>Purchase behaviours</b>                  | Via animal-specific selling website (n = 788)  | No                      | 278; 97                 | 25.9        |              | Ref                  |              |
|                                             |                                                | <b>Yes</b>              | <b>266; 147</b>         | <b>35.6</b> | <b>1.584</b> | <b>1.166 – 2.152</b> | <b>0.003</b> |
|                                             | Viewed in person prior to purchase (n = 789)   | No                      | 164; 69                 | 29.6        |              | Ref                  |              |
|                                             |                                                | Yes                     | 381; 175                | 31.5        | 1.092        | 0.782 – 1.524        | 0.606        |
| <b>Potentially illegal sales indicators</b> | Sold without dam present (n = 788)             | No                      | 431; 189                | 30.5        |              | Ref                  |              |
|                                             |                                                | Yes                     | 113; 55                 | 32.7        | 1.110        | 0.771 – 1.599        | 0.575        |
|                                             | Sold outside breeders' home (n = 789)          | No                      | 337; 164                | 32.7        |              | Ref                  |              |
|                                             |                                                | Yes                     | 208; 80                 | 27.8        | 0.790        | 0.575 – 1.087        | 0.147        |
|                                             | Sold without a microchip (n = 775)             | No                      | 509; 232                | 31.3        |              | Ref                  |              |
|                                             |                                                | Yes                     | 25; 9                   | 26.5        | 0.790        | 0.363 – 1.719        | 0.552        |
|                                             | Sold < 6 weeks of age (n = 788)                | No                      | 544; 243                | 30.9        |              | Ref                  |              |
|                                             |                                                | Yes                     | 0; 1                    | 100.0       | ~            | ~                    | ~            |
|                                             | Sold with passport < 13 weeks of age (n = 719) | No                      | 467; 213                | 31.3        |              | Ref                  |              |
|                                             |                                                | Yes                     | 28; 11                  | 28.2        | 0.861        | 0.421 – 1.763        | 0.683        |
| <b>Socialisation &lt; 16 weeks</b>          | Attended puppy classes (n = 788)               | No                      | 318; 138                | 30.3        |              | Ref                  |              |
|                                             |                                                | Yes, in person          | 186; 86                 | 31.6        | 1.065        | 0.770 – 1.474        | 0.702        |
|                                             |                                                | Yes, online             | 41; 19                  | 31.7        | 1.068        | 0.598 – 1.906        | 0.824        |
|                                             | Deliberately left at home alone (n = 691)      | No                      | 68; 41                  | 62.4; 37.6  |              | Ref                  |              |
|                                             |                                                | Yes                     | 414; 168                | 71.1; 28.9  | 0.673        | 0.439 – 1.032        | 0.069        |

Table S3. Contd...

|                             | Variable                                           | Category                     | <i>n</i> (not a case;<br>case) | % (case)    | Odds Ratio   | 95% CI*              | <i>p</i> -Value |
|-----------------------------|----------------------------------------------------|------------------------------|--------------------------------|-------------|--------------|----------------------|-----------------|
| <b>Adult<br/>management</b> | Attended adult classes ( <i>n</i> = 789)           | No                           | 290; 148                       | 33.8        |              | Ref                  |                 |
|                             |                                                    | Yes, in person               | 234; 90                        | 27.8        | 0.754        | 0.551 – 1.031        | 0.077           |
|                             |                                                    | Yes, online                  | 21; 6                          | 22.2        | 0.560        | 0.221 – 1.417        | 0.221           |
|                             | Owner training method ( <i>n</i> = 766)            | Rewards-based only           | 98; 39                         | 28.5        |              | Ref                  |                 |
|                             |                                                    | Rewards-based & 1 aversive   | 106; 44                        | 29.3        | 1.043        | 0.626 – 1.739        | 0.872           |
|                             |                                                    | Rewards-based & > 1 aversive | 321; 158                       | 33.0        | 1.237        | 0.815 – 1.877        | 0.318           |
|                             |                                                    | Aversive only                | 0; 0                           | 0.0         | ~            | ~                    | ~               |
|                             | Owner response to SRB ( <i>n</i> = 212)            | No response                  | 32; 73                         | 69.5        |              | Ref                  |                 |
|                             |                                                    | Positive response            | 26; 56                         | 68.3        | 0.944        | 0.506 – 1.762        | 0.857           |
|                             |                                                    | Aversive response            | 7; 13                          | 65.0        | 0.814        | 0.297 – 2.232        | 0.689           |
|                             |                                                    | Mixed response               | 1; 4                           | 80.0        | 1.753        | 0.188 – 16.312       | 0.622           |
|                             | Exercise frequency (walks)<br>( <i>n</i> = 785)    | Never                        | 0; 0                           | 0.0         | ~            | ~                    | ~               |
|                             |                                                    | < Once a week                | 0; 2                           | 100.0       | ~            | ~                    | ~               |
|                             |                                                    | Once a week                  | 1; 0                           | 0.0         | ~            | ~                    | ~               |
|                             |                                                    | Several times per week       | 26; 18                         | 40.9        | 1.594        | 0.839 – 3.028        | 0.154           |
|                             |                                                    | Once per day                 | 146; 71                        | 32.7        | 1.120        | 0.780 – 1.608        | 0.540           |
|                             |                                                    | Twice per day                | 251; 109                       | 30.3        |              | Ref                  |                 |
|                             |                                                    | > Twice per day              | 118; 43                        | 26.7        | 0.839        | 0.554 – 1.271        | 0.408           |
|                             | Exercise frequency (off lead)<br>( <i>n</i> = 783) | Never                        | 28; 14                         | 33.3        | 0.970        | 0.485 – 1.941        | 0.932           |
|                             |                                                    | < Once a week                | 20; 8                          | 28.6        | 0.776        | 0.328 – 1.836        | 0.564           |
|                             |                                                    | Once a week                  | 19; 8                          | 29.6        | 0.817        | 0.343 – 1.944        | 0.648           |
|                             |                                                    | Several times per week       | 93; 36                         | 27.9        | 0.751        | 0.471 – 1.197        | 0.229           |
|                             |                                                    | Once per day                 | 163; 84                        | 34.0        |              | Ref                  |                 |
|                             |                                                    | Twice per day                | 134; 61                        | 31.3        | 0.883        | 0.591 – 1.319        | 0.545           |
|                             |                                                    | > Twice per day              | 83; 32                         | 27.8        | 0.784        | 0.460 – 1.216        | 0.241           |
|                             | Time left alone ( <i>n</i> = 789)                  | Never                        | 48; 34                         | 41.5        |              | Ref                  |                 |
|                             |                                                    | Up to 1 hour                 | 89; 53                         | 37.3        | 0.841        | 0.482 – 1.465        | 0.540           |
|                             |                                                    | <b>1 to 4 hours</b>          | <b>333; 129</b>                | <b>27.9</b> | <b>0.547</b> | <b>0.337 – 0.887</b> | <b>0.015</b>    |
|                             |                                                    | <b>Over 4 hours</b>          | <b>75; 28</b>                  | <b>27.2</b> | <b>0.527</b> | <b>0.284 – 0.977</b> | <b>0.042</b>    |

Table S3. Contd...

|                         | Variable                                                        | Category                            | n (not a case;<br>case) | % (case)    | Odds Ratio   | 95% CI*              | p-Value           |
|-------------------------|-----------------------------------------------------------------|-------------------------------------|-------------------------|-------------|--------------|----------------------|-------------------|
| <b>Adult management</b> | Change in time left alone from < 16 weeks (n = 774)             | Same amount of time                 | 218; 96                 | 30.6        |              | Ref                  |                   |
|                         |                                                                 | <b>Less time</b>                    | <b>9; 15</b>            | <b>62.5</b> | <b>3.785</b> | <b>1.601 – 8.949</b> | <b>0.002</b>      |
|                         |                                                                 | More time ≤ 4 hours                 | 239; 101                | 29.7        | 0.960        | 0.687 – 1.341        | 0.809             |
|                         |                                                                 | More time > 4 hours                 | 69; 27                  | 28.1        | 0.889        | 0.536 – 1.473        | 0.647             |
|                         | Location left alone (n = 768)                                   | A crate/indoor kennel (door closed) | 85; 30                  | 26.1        | 0.747        | 0.470 – 1.186        | 0.215             |
|                         |                                                                 | Loose in a single room              | 152; 66                 | 30.3        | 0.918        | 0.646 – 1.306        | 0.636             |
|                         |                                                                 | Loose in multiple rooms             | 294; 139                | 32.1        |              | Ref                  |                   |
|                         |                                                                 | Outdoor kennel (door closed)        | 1; 0                    | 0.0         | ~            | ~                    | ~                 |
|                         |                                                                 | Outdoor kennel (door open)          | 0; 0                    | 0.0         | ~            | ~                    | ~                 |
|                         |                                                                 | Loose in an enclosed outdoor space  | 1; 0                    | 0.0         | ~            | ~                    | ~                 |
|                         | General advice source for training and behaviour (n = 778)      | Non-professional                    | 176; 58                 | 24.8        |              | Ref                  |                   |
|                         |                                                                 | <b>Professional</b>                 | <b>364; 180</b>         | <b>33.1</b> | <b>1.501</b> | <b>1.061 – 2.122</b> | <b>0.022</b>      |
| <b>Dog behaviour</b>    | Total number of owner-reported undesirable behaviours (n = 726) | /                                   | /                       | /           | <b>1.126</b> | <b>1.069 – 1.186</b> | <b>&lt; 0.001</b> |
|                         | Control behaviour score (n = 769)                               | 0                                   | 95; 28                  | 22.8        |              | Ref                  |                   |
|                         |                                                                 | <b>1+</b>                           | <b>436; 210</b>         | <b>32.5</b> | <b>1.634</b> | <b>1.039 – 2.569</b> | <b>0.033</b>      |
|                         | Attention seeking behaviour score (n = 765)                     | 0                                   | 145; 28                 | 16.2        |              | Ref                  |                   |
|                         |                                                                 | <b>1+</b>                           | <b>389; 203</b>         | <b>34.3</b> | <b>2.702</b> | <b>1.743 – 4.191</b> | <b>&lt; 0.001</b> |
|                         | Aggressive behaviour score (n = 779)                            | 0                                   | 415; 172                | 29.3        |              | Ref                  |                   |
|                         |                                                                 | <b>1+</b>                           | <b>124; 68</b>          | <b>35.4</b> | <b>1.323</b> | <b>0.937 – 1.868</b> | <b>0.112</b>      |
|                         | Fear/avoidance behaviour score (n = 776)                        | 0                                   | 340; 121                | 26.2        |              | Ref                  |                   |
|                         |                                                                 | <b>1+</b>                           | <b>197; 118</b>         | <b>37.5</b> | <b>1.683</b> | <b>1.236 – 2.291</b> | <b>&lt; 0.001</b> |
|                         | Reaction to familiar people (n = 783)                           | 0                                   | 515; 224                | 30.3        |              | Ref                  |                   |
|                         |                                                                 | <b>1+</b>                           | <b>28; 16</b>           | <b>36.4</b> | <b>1.314</b> | <b>0.697 – 2.477</b> | <b>0.399</b>      |
|                         | Reaction to unfamiliar people (n = 782)                         | 0                                   | 435; 181                | 29.4        |              | Ref                  |                   |
|                         |                                                                 | <b>1+</b>                           | <b>106; 60</b>          | <b>36.1</b> | <b>1.360</b> | <b>0.948 – 1.952</b> | <b>0.095</b>      |
|                         | Reaction to other dogs (n = 780)                                | 0                                   | 427; 183                | 30.0        |              | Ref                  |                   |
|                         |                                                                 | <b>1+</b>                           | <b>113; 57</b>          | <b>33.5</b> | <b>1.177</b> | <b>0.819 – 1.691</b> | <b>0.378</b>      |

## Supplementary Table S4: Owner training method score, descriptive and univariable analysis

**Table S4.** Descriptive and univariable analysis of owner training methods at 21 months.

Descriptive and univariable analysis of the binary categorisation of 27 training methods/aids presented to participants in response to the question “*Have you or anyone in your household ever used any of the following aids or methods on/with your dog, to try and change any aspect of their behaviour?*”. Methods/aids were allocated to the four quadrants of operant conditioning and categorised as rewards-based (positive reinforcement/negative punishment) or aversive (negative reinforcement/positive punishment). An additional reward method/aid and an additional aversive method/aid from qualitative content analysis of free-text responses was also included. Owners who reported using only positive reinforcement or negative punishment aids/methods were categorised as rewards-based only. Those using a mix of all four operant conditioning quadrants were categorised as mixed. No respondents reported using only negative reinforcement or positive punishment (aversive only). Significant results are emboldened. ~ No analysis possible.

| Variable                                     | Category                                                    | <i>n</i> (reward only; mixed) | % (mixed) | Odds Ratio | 95% CI* | <i>p</i> -Value |
|----------------------------------------------|-------------------------------------------------------------|-------------------------------|-----------|------------|---------|-----------------|
| <b>Owner/<br/>household<br/>demographics</b> | First-time dog owner ( <i>n</i> = 895)                      | No                            | 92; 455   | 83.2       | Ref     |                 |
|                                              |                                                             | Yes                           | 65; 283   | 81.3       | 0.880   | 0.620 – 1.250   |
|                                              | Owner age ( <i>n</i> = 894)                                 | 18-24 years                   | 5; 32     | 86.5       | 1.108   | 0.405 – 3.031   |
|                                              |                                                             | 25-34 years                   | 31; 139   | 81.8       | 0.776   | 0.459 – 1.313   |
|                                              |                                                             | 35-44 years                   | 37; 131   | 78.0       | 0.613   | 0.369 – 1.019   |
|                                              |                                                             | 45-54 years                   | 36; 208   | 85.2       | Ref     |                 |
|                                              |                                                             | 55-64 years                   | 32; 135   | 80.8       | 0.730   | 0.433 – 1.232   |
|                                              |                                                             | 65-74 years                   | 13; 81    | 86.2       | 1.078   | 0.544 – 2.138   |
|                                              |                                                             | ≥ 75 years                    | 2; 12     | 85.7       | 1.038   | 0.223 – 4.835   |
|                                              | Owner gender ( <i>n</i> = 895)                              | Female                        | 145; 666  | 82.1       | Ref     |                 |
|                                              |                                                             | Male                          | 11; 73    | 86.9       | 1.445   | 0.748 – 2.792   |
|                                              | Child ≤ 16 years in household (in 2020) ( <i>n</i> = 895)   | No                            | 114; 539  | 82.5       | Ref     |                 |
|                                              |                                                             | Yes                           | 43; 199   | 82.2       | 0.979   | 0.665 – 1.441   |
|                                              | Employed in animal care/veterinary sector ( <i>n</i> = 896) | No                            | 147; 684  | 82.3       | Ref     |                 |
|                                              |                                                             | Yes                           | 10; 55    | 84.6       | 1.182   | 0.589 – 2.373   |
|                                              | Another dog(s) in household (in 2020) ( <i>n</i> = 886)     | No                            | 110; 540  | 83.1       | Ref     |                 |
|                                              |                                                             | Yes                           | 43; 193   | 81.8       | 0.914   | 0.620 – 1.349   |

Table S4. Contd...

|                                              | Variable                                                                 | Category                             | <i>n</i> (reward only; mixed) | % (mixed) | Odds Ratio | 95% CI*        | <i>p</i> -Value |
|----------------------------------------------|--------------------------------------------------------------------------|--------------------------------------|-------------------------------|-----------|------------|----------------|-----------------|
| <b>Owner/<br/>household<br/>demographics</b> | Current working location of owner<br>( <i>n</i> = 848)                   | At home                              | 28; 169                       | 85.8      | 1.360      | 0.818 – 2.260  | 0.235           |
|                                              |                                                                          | Away from home                       | 35; 142                       | 80.2      | 0.914      | 0.563 – 1.484  | 0.717           |
|                                              |                                                                          | At and away from home                | 48; 213                       | 81.6      | Ref        |                |                 |
|                                              |                                                                          | Unemployed                           | 5; 22                         | 81.5      | 0.992      | 0.357 – 2.751  | 0.987           |
|                                              |                                                                          | Retired                              | 33; 153                       | 82.3      | 1.045      | 0.640 – 1.705  | 0.861           |
|                                              | Current working location of other<br>household members ( <i>n</i> = 741) | At home                              | 24; 119                       | 83.2      | 0.887      | 0.501 – 1.570  | 0.681           |
|                                              |                                                                          | Away from home                       | 51; 193                       | 83.2      | 0.677      | 0.420 – 1.092  | 0.110           |
|                                              |                                                                          | At and away from home                | 34; 190                       | 84.8      | Ref        |                |                 |
|                                              |                                                                          | Unemployed                           | 1; 9                          | 90.0      | 1.611      | 0.198 – 13.125 | 0.656           |
|                                              |                                                                          | Retired                              | 18; 102                       | 85.0      | 1.014      | 0.546 – 1.885  | 0.965           |
|                                              | Owner lives alone/only adult in the<br>household ( <i>n</i> = 849)       | No                                   | 126; 609                      | 82.9      | Ref        |                |                 |
|                                              |                                                                          | Yes                                  | 23; 91                        | 79.8      | 0.819      | 0.498 – 1.344  | 0.429           |
| <b>Dog<br/>demographics</b>                  | Dog sex ( <i>n</i> = 895)                                                | Female                               | 84; 345                       | 80.4      | Ref        |                |                 |
|                                              |                                                                          | Male                                 | 73; 393                       | 84.3      | 1.311      | 0.928 – 1.851  | 0.125           |
|                                              | Neutered ( <i>n</i> = 896)                                               | No                                   | 69; 301                       | 81.4      | Ref        |                |                 |
|                                              |                                                                          | Yes                                  | 88; 438                       | 83.3      | 1.141      | 0.806 – 1.615  | 0.457           |
|                                              | Breed purity designation ( <i>n</i> = 896)                               | Crossbred                            | 6; 33                         | 84.6      | Ref        |                |                 |
|                                              |                                                                          | Purebred                             | 104; 514                      | 83.2      | 0.899      | 0.367 – 2.199  | 0.815           |
|                                              |                                                                          | Designer Crossbred                   | 47; 192                       | 80.3      | 0.743      | 0.294 – 1.876  | 0.529           |
|                                              | Top 12 most common breeds at 21<br>months ( <i>n</i> = 896)              | Crossbred                            | 6; 33                         | 84.6      | Ref        |                |                 |
|                                              |                                                                          | Cockapoo                             | 15; 73                        | 83.0      | 0.885      | 0.315 – 2.484  | 0.816           |
|                                              |                                                                          | Labradoodle                          | 5; 20                         | 80.0      | 0.727      | 0.196 – 2.696  | 0.634           |
|                                              |                                                                          | Cavapoo                              | 3; 13                         | 81.3      | 0.788      | 0.171 – 3.629  | 0.760           |
|                                              |                                                                          | Labrador Retriever                   | 9; 88                         | 90.7      | 1.778      | 0.587 – 5.382  | 0.309           |
|                                              |                                                                          | Cocker Spaniel                       | 11; 52                        | 82.5      | 0.860      | 0.290 – 2.547  | 0.785           |
|                                              |                                                                          | Border Collie                        | 2; 29                         | 93.5      | 2.636      | 0.493 – 14.093 | 0.257           |
|                                              |                                                                          | Miniature Smooth-Haired<br>Dachshund | 8; 18                         | 69.2      | 0.409      | 0.123 – 1.364  | 0.146           |
|                                              |                                                                          | Border Terrier                       | 2; 23                         | 92.0      | 2.091      | 0.387 – 11.292 | 0.391           |
|                                              |                                                                          | Golden Retriever                     | 3; 24                         | 88.9      | 1.455      | 0.330 – 6.404  | 0.620           |
|                                              |                                                                          | Whippet                              | 6; 13                         | 68.4      | 0.394      | 0.107 – 1.447  | 0.160           |
|                                              |                                                                          | English Springer Spaniel             | 1; 19                         | 95.0      | 3.455      | 0.386 – 30.897 | 0.267           |
|                                              |                                                                          | Other                                | 86; 334                       | 79.5      | 0.706      | 0.287 – 1.740  | 0.449           |

Table S4. Contd...

|                                                        | Variable                                                           | Category                | <i>n</i> (reward only; mixed) | % (mixed)   | Odds Ratio   | 95% CI*              | <i>p</i> -Value |
|--------------------------------------------------------|--------------------------------------------------------------------|-------------------------|-------------------------------|-------------|--------------|----------------------|-----------------|
| <b>Dog demographics</b>                                | Breed group ( <i>n</i> = 896)                                      | Not KC recognised       | 55; 231                       | 80.8        |              | Ref                  |                 |
|                                                        |                                                                    | <b>Gundog</b>           | <b>31; 235</b>                | <b>88.3</b> | <b>1.805</b> | <b>1.121 – 2.906</b> | <b>0.015</b>    |
|                                                        |                                                                    | Hound                   | 20; 62                        | 75.6        | 0.738        | 0.412 – 1.323        | 0.308           |
|                                                        |                                                                    | <b>Pastoral</b>         | <b>5; 58</b>                  | <b>92.1</b> | <b>2.762</b> | <b>1.058 – 7.211</b> | <b>0.038</b>    |
|                                                        |                                                                    | Terrier                 | 15; 63                        | 80.8        | 1.000        | 0.530 – 1.888        | 1.000           |
|                                                        |                                                                    | Toy                     | 8; 16                         | 66.7        | 0.476        | 0.194 – 1.169        | 0.105           |
|                                                        |                                                                    | Utility                 | 13; 50                        | 79.4        | 0.916        | 0.465 – 1.803        | 0.799           |
|                                                        |                                                                    | Working                 | 10; 24                        | 70.6        | 0.571        | 0.258 – 1.264        | 0.167           |
|                                                        | Typical adult bodyweight ( <i>n</i> = 863)                         | ≤ 10 kg                 | 43; 128                       | 74.9        | 0.671        | 0.432 – 1.041        | 0.075           |
|                                                        |                                                                    | 10 to < 20 kg           | 64; 284                       | 81.6        |              | Ref                  |                 |
|                                                        |                                                                    | 20 to < 30 kg           | 29; 171                       | 85.5        | 1.329        | 0.824 – 2.143        | 0.244           |
|                                                        |                                                                    | <b>30 to &lt; 40 kg</b> | <b>13; 115</b>                | <b>89.8</b> | <b>1.993</b> | <b>1.057 – 3.759</b> | <b>0.033</b>    |
|                                                        |                                                                    | ≥ 40 kg                 | 4; 12                         | 75.0        | 0.676        | 0.211 – 2.164        | 0.510           |
| <b>Purchase motivations for a dog/for breed chosen</b> | Dog to improve mental health ( <i>n</i> = 896)                     | No                      | 87; 363                       | 80.7        |              | Ref                  |                 |
|                                                        |                                                                    | Yes                     | 70; 376                       | 84.3        | 1.287        | 0.911 – 1.820        | 0.153           |
|                                                        | Breed size suited to my lifestyle ( <i>n</i> = 896)                | No                      | 44; 234                       | 84.2        |              | Ref                  |                 |
|                                                        |                                                                    | Yes                     | 113; 505                      | 81.7        | 0.840        | 0.574 – 1.230        | 0.371           |
|                                                        | Breed good with children ( <i>n</i> = 896)                         | No                      | 78; 413                       | 84.1        |              | Ref                  |                 |
|                                                        |                                                                    | Yes                     | 79; 326                       | 80.5        | 0.779        | 0.552 – 1.100        | 0.157           |
|                                                        | Breed easy to train ( <i>n</i> = 896)                              | No                      | 97; 372                       | 79.3        |              | Ref                  |                 |
|                                                        |                                                                    | <b>Yes</b>              | <b>60; 367</b>                | <b>85.9</b> | <b>1.595</b> | <b>1.121 – 2.270</b> | <b>0.009</b>    |
|                                                        | Friends or family own this breed/crossbreed ( <i>n</i> = 896)      | No                      | 120; 562                      | 82.4        |              | Ref                  |                 |
|                                                        |                                                                    | Yes                     | 37; 177                       | 82.7        | 1.021        | 0.681 – 1.532        | 0.918           |
|                                                        | Respondent driving force to get a dog ( <i>n</i> = 878)            | No                      | 86; 428                       | 83.3        |              | Ref                  |                 |
|                                                        |                                                                    | Yes                     | 69; 295                       | 81.0        | 0.859        | 0.606 – 1.219        | 0.395           |
|                                                        | Had more time for a dog due to COVID-19 pandemic ( <i>n</i> = 372) | No                      | 10; 39                        | 79.6        |              | Ref                  |                 |
|                                                        |                                                                    | Yes                     | 54; 269                       | 83.3        | 1.277        | 0.601 – 2.714        | 0.524           |
| <b>Pre-purchase research</b>                           | Research conducted ( <i>n</i> = 895)                               | No                      | 59; 312                       | 84.1        |              | Ref                  |                 |
|                                                        |                                                                    | Yes                     | 98; 426                       | 81.3        | 0.822        | 0.577 – 1.172        | 0.278           |
| <b>Purchase behaviours</b>                             | Via animal-specific selling website ( <i>n</i> = 895)              | No                      | 81; 362                       | 81.7        |              | Ref                  |                 |
|                                                        |                                                                    | Yes                     | 76; 376                       | 83.2        | 1.107        | 0.784 – 1.563        | 0.563           |
|                                                        | Viewed in person prior to purchase ( <i>n</i> = 896)               | No                      | 53; 219                       | 80.5        |              | Ref                  |                 |
|                                                        |                                                                    | Yes                     | 104; 520                      | 83.3        | 1.210        | 0.839 – 1.746        | 0.308           |



Table S4. Contd...

|                                             | Variable                                         | Category               | <i>n</i> (reward only; mixed) | % (mixed)   | Odds Ratio   | 95% CI*              | <i>p</i> -Value   |
|---------------------------------------------|--------------------------------------------------|------------------------|-------------------------------|-------------|--------------|----------------------|-------------------|
| <b>Potentially illegal sales indicators</b> | Sold without dam present ( <i>n</i> = 895)       | No                     | 127; 577                      | 82.0        |              | Ref                  |                   |
|                                             |                                                  | Yes                    | 30; 161                       | 84.3        | 1.181        | 0.765 – 1.824        | 0.453             |
|                                             | Sold outside breeders' home ( <i>n</i> = 896)    | No                     | 109; 452                      | 80.6        |              | Ref                  |                   |
|                                             |                                                  | Yes                    | 48; 287                       | 85.7        | 1.442        | 0.996 – 2.088        | 0.053             |
|                                             | Sold without a microchip ( <i>n</i> = 879)       | No                     | 150; 691                      | 82.2        |              | Ref                  |                   |
|                                             |                                                  | Yes                    | 5; 33                         | 86.8        | 1.433        | 0.550 – 3.731        | 0.461             |
|                                             | Sold < 6 weeks of age ( <i>n</i> = 895)          | No                     | 157; 736                      | 82.4        |              | Ref                  |                   |
|                                             |                                                  | Yes                    | 0; 2                          | 100.0       | ~            | ~                    | ~                 |
| <b>Owner expectations</b>                   | Behaviour ( <i>n</i> = 860)                      | As expected/better     | 135; 593                      | 81.5        |              | Ref                  |                   |
|                                             |                                                  | Worse                  | 17; 115                       | 87.1        | 1.540        | 0.895 – 2.649        | 0.119             |
|                                             | Training/maintaining obedience ( <i>n</i> = 889) | As expected/easier     | 118; 471                      | 80.0        |              | Ref                  |                   |
|                                             |                                                  | <b>Harder</b>          | <b>38; 262</b>                | <b>87.3</b> | <b>1.727</b> | <b>1.163 – 2.565</b> | <b>0.007</b>      |
| <b>Socialisation &lt; 16 weeks</b>          | Attended puppy classes ( <i>n</i> = 895)         | No                     | 82; 431                       | 84.0        |              | Ref                  |                   |
|                                             |                                                  | Yes, in person         | 52; 260                       | 83.3        | 0.951        | 0.651 – 1.391        | 0.797             |
|                                             |                                                  | <b>Yes, online</b>     | <b>23; 47</b>                 | <b>67.1</b> | <b>0.389</b> | <b>0.224 – 0.675</b> | <b>&lt; 0.001</b> |
| <b>Adult management</b>                     | Attended adult classes ( <i>n</i> = 896)         | No                     | 96; 395                       | 80.4        |              | Ref                  |                   |
|                                             |                                                  | Yes, in person         | 54; 315                       | 85.4        | 1.418        | 0.984 – 2.042        | 0.061             |
|                                             |                                                  | Yes, online            | 7; 29                         | 80.6        | 1.007        | 0.428 – 2.367        | 0.987             |
|                                             | Exercise frequency (walks) ( <i>n</i> = 860)     | Never                  | 0; 1                          | 100.0       | ~            | ~                    | ~                 |
|                                             |                                                  | < Once a week          | 0; 3                          | 100.0       | ~            | ~                    | ~                 |
|                                             |                                                  | Once a week            | 1; 2                          | 66.7        | 0.426        | 0.038 – 4.764        | 0.488             |
|                                             |                                                  | Several times per week | 9; 36                         | 80.0        | 0.852        | 0.392 – 1.850        | 0.685             |
|                                             |                                                  | Once per day           | 43; 186                       | 81.2        | 0.921        | 0.604 – 1.404        | 0.703             |
|                                             |                                                  | Twice per day          | 69; 324                       | 82.4        |              | Ref                  |                   |
|                                             |                                                  | > Twice per day        | 31; 155                       | 83.3        | 1.065        | 0.669 – 1.695        | 0.791             |
|                                             | Exercise frequency (off lead) ( <i>n</i> = 858)  | Never                  | 12; 38                        | 76.0        | 0.619        | 0.299 – 1.280        | 0.196             |
|                                             |                                                  | < Once a week          | 3; 26                         | 89.7        | 1.694        | 0.491 – 5.848        | 0.404             |
|                                             |                                                  | Once a week            | 3; 24                         | 88.9        | 1.564        | 0.451 – 5.425        | 0.481             |
|                                             |                                                  | Several times per week | 26; 115                       | 81.6        | 0.865        | 0.506 – 1.478        | 0.595             |
|                                             |                                                  | Once per day           | 43; 220                       | 83.7        |              | Ref                  |                   |
|                                             |                                                  | Twice per day          | 41; 178                       | 81.3        | 0.849        | 0.530 – 1.359        | 0.495             |
|                                             |                                                  | > Twice per day        | 25; 104                       | 80.6        | 0.813        | 0.471 – 1.403        | 0.457             |

Table S4. Contd...

|                  | Variable                                                        | Category                                   | n (reward only; mixed) | % (mixed)   | Odds Ratio   | 95% CI*               | p-Value           |
|------------------|-----------------------------------------------------------------|--------------------------------------------|------------------------|-------------|--------------|-----------------------|-------------------|
| Adult management | Time left alone (n = 869)                                       | Never                                      | 17; 83                 | 83.0        |              | Ref                   |                   |
|                  |                                                                 | Up to 1 hour                               | 36; 121                | 77.1        | 0.688        | 0.363 – 1.307         | 0.254             |
|                  |                                                                 | 1 to 4 hours                               | 91; 411                | 81.9        | 0.925        | 0.524 – 1.634         | 0.788             |
|                  |                                                                 | Over 4 hours                               | 10; 100                | 90.9        | 2.048        | 0.890 – 4.714         | 0.092             |
|                  | Location left alone (n = 833)                                   | <b>A crate/indoor kennel (door closed)</b> | <b>16; 114</b>         | <b>87.7</b> | <b>1.800</b> | <b>1.018 – 3.184</b>  | <b>0.043</b>      |
|                  |                                                                 | Loose in a single room                     | 37; 197                | 84.2        | 1.345        | 0.866 – 2.043         | 0.164             |
|                  |                                                                 | Loose in multiple rooms                    | 94; 372                | 79.8        |              | Ref                   |                   |
|                  |                                                                 | Outdoor kennel (door closed)               | 0; 1                   | 100.0       | ~            | ~                     | ~                 |
|                  |                                                                 | Outdoor kennel (door open)                 | 0; 1                   | 100.0       | ~            | ~                     | ~                 |
|                  |                                                                 | Loose in an enclosed outdoor space         | 0; 1                   | 100.0       | ~            | ~                     | ~                 |
|                  | Change in time left alone from < 16 weeks (n = 840)             | Same amount of time                        | 67; 282                | 80.8        |              | Ref                   |                   |
|                  |                                                                 | Less time                                  | 4; 23                  | 85.2        | 1.366        | 0.457 – 4.082         | 0.576             |
|                  |                                                                 | More time ≤ 4 hours                        | 66; 298                | 81.9        | 1.073        | 0.736 – 1.564         | 0.715             |
|                  |                                                                 | <b>More time &gt; 4 hours</b>              | <b>10; 90</b>          | <b>90.0</b> | <b>2.138</b> | <b>1.056 – 4.330</b>  | <b>0.035</b>      |
|                  | General advice source for training and behaviour (n = 864)      | Non-professional                           | 48; 204                | 81.0        |              | Ref                   |                   |
|                  |                                                                 | Professional                               | 107; 505               | 82.5        | 1.111        | 0.761 – 1.620         | 0.586             |
|                  | Respondent primary carer for dog (n = 895)                      | Shares care                                | 60; 328                | 84.5        |              | Ref                   |                   |
|                  |                                                                 | No                                         | 1; 3                   | 75.0        | 0.549        | 0.056 – 5.364         | 0.606             |
|                  |                                                                 | Yes                                        | 95; 408                | 81.1        | 0.786        | 0.551 – 1.120         | 0.182             |
| Dog behaviour    | Total number of owner-reported undesirable behaviours (n = 762) | /                                          | /                      | /           | <b>1.217</b> | <b>1.129 – 1.311</b>  | <b>&lt; 0.001</b> |
|                  |                                                                 | /                                          | /                      | /           |              |                       |                   |
|                  | Control behaviour score (n = 854)                               | 0                                          | 45; 89                 | 66.4        |              | Ref                   |                   |
|                  |                                                                 | <b>1+</b>                                  | <b>107; 613</b>        | <b>85.1</b> | <b>2.897</b> | <b>1.916 – 4.379</b>  | <b>&lt; 0.001</b> |
|                  | Attention seeking behaviour score (n = 812)                     | 0                                          | 45; 137                | 75.3        |              | Ref                   |                   |
|                  |                                                                 | <b>1+</b>                                  | <b>97; 533</b>         | <b>84.6</b> | <b>1.805</b> | <b>1.210 – 2.693</b>  | <b>0.004</b>      |
|                  | Aggressive behaviour score (n = 866)                            | 0                                          | 127; 523               | 80.5        |              | Ref                   |                   |
|                  |                                                                 | <b>1+</b>                                  | <b>25; 191</b>         | <b>88.4</b> | <b>1.855</b> | <b>1.171 – 2.938</b>  | <b>0.008</b>      |
|                  | Fear/avoidance behaviour score (n = 861)                        | 0                                          | 98; 402                | 80.4        |              | Ref                   |                   |
|                  |                                                                 | <b>1+</b>                                  | <b>54; 307</b>         | <b>85.0</b> | <b>1.386</b> | <b>0.963 – 1.994</b>  | <b>0.079</b>      |
|                  | Reaction to familiar people (n = 868)                           | 0                                          | 151; 667               | 81.5        |              | Ref                   |                   |
|                  |                                                                 | <b>1+</b>                                  | <b>2; 48</b>           | <b>96.0</b> | <b>5.433</b> | <b>1.306 – 22.601</b> | <b>0.020</b>      |

Table S4. Contd...

|                      | Variable                                           | Category | <i>n</i> (reward only; mixed) | % (mixed)   | Odds Ratio   | 95% CI*              | <i>p</i> -Value |
|----------------------|----------------------------------------------------|----------|-------------------------------|-------------|--------------|----------------------|-----------------|
| <b>Dog behaviour</b> | Reaction to unfamiliar people<br>( <i>n</i> = 872) | 0        | 134; 555                      | 80.6        |              | Ref                  |                 |
|                      |                                                    | 1+       | <b>20; 163</b>                | <b>89.1</b> | <b>1.968</b> | <b>1.192 – 3.248</b> | <b>0.008</b>    |
|                      | Reaction to other dogs<br>( <i>n</i> = 869)        | 0        | 131; 547                      | 80.7        |              | Ref                  |                 |
|                      |                                                    | 1+       | <b>23; 168</b>                | <b>88.0</b> | <b>1.749</b> | <b>1.087 – 2.815</b> | <b>0.021</b>    |
|                      | SRB case<br>( <i>n</i> = 766)                      | No       | 998; 427                      | 81.3        |              | Ref                  |                 |
|                      |                                                    | Yes      | 39; 202                       | 83.8        | 1.189        | 0.791 – 1.786        | 0.405           |

## Supplementary Table S5: Owner sources of advice for general training and behaviour queries, descriptive and univariate logistic regression analysis

**Table S5. Descriptive and univariable analysis of categorical variables and owner sources of advice for their dog's behaviour and training queries during the first 21 months.**

Descriptive and univariable binary logistic regression analysis of dogs whose owners responded to the question “Where have you sought information about any aspect of your dog's general behaviour or training since the last survey?”. Responses were categorised as a binary outcome as to whether they sought professional advice where “A veterinary professional (e.g., veterinary surgeon, veterinary nurse)”, “Dog trainer” or “Dog behaviourist” were coded separately from all other advice sources, which were coded together as one outcome along with four additional sources from qualitative content analysis of free-text responses. Owners who had answered “I can't remember” were reclassified as missing data. \*95% confidence interval. Significant results are emboldened. ~ No analysis possible.

|                                     | Variable                                               | Category           | n<br>(professional;<br>other) | %<br>(professional) | Odds Ratio   | 95% CI*              | p-Value           |
|-------------------------------------|--------------------------------------------------------|--------------------|-------------------------------|---------------------|--------------|----------------------|-------------------|
| Owner/<br>household<br>demographics | First-time dog owner<br>(n = 890)                      | No                 | 359; 189                      | 65.5                |              | Ref                  |                   |
|                                     |                                                        | Yes                | <b>267; 75</b>                | <b>78.1</b>         | <b>1.874</b> | <b>1.373 – 2.558</b> | <b>&lt; 0.001</b> |
|                                     | Owner age<br>(n = 889)                                 | 18-24 years        | 30; 7                         | 81.1                | 1.661        | 0.697 – 3.959        | 0.252             |
|                                     |                                                        | 25-34 years        | 125; 44                       | 74.0                | 1.101        | 0.708 – 1.713        | 0.669             |
|                                     |                                                        | 35-44 years        | 121; 44                       | 73.3                | 1.066        | 0.684 – 1.660        | 0.777             |
|                                     |                                                        | 45-54 years        | 178; 69                       | 72.1                |              | Ref                  |                   |
|                                     |                                                        | 55-64 years        | 109; 53                       | 67.3                | 0.797        | 0.519 – 1.226        | 0.302             |
|                                     |                                                        | <b>65-74 years</b> | <b>53; 43</b>                 | <b>55.2</b>         | <b>0.478</b> | <b>0.293 – 0.779</b> | <b>0.003</b>      |
|                                     |                                                        | ≥ 75 years         | 9; 4                          | 69.2                | 0.872        | 0.260 – 2.925        | 0.825             |
|                                     | Owner gender (n = 890)                                 | Female             | 575; 233                      | 71.2                |              | Ref                  |                   |
|                                     |                                                        | Male               | 51; 31                        | 62.2                | 0.667        | 0.416 – 1.068        | 0.092             |
|                                     | Child ≤ 16 years in household<br>(in 2020; n = 890)    | No                 | 458; 193                      | 70.4                |              | Ref                  |                   |
|                                     |                                                        | Yes                | 168; 71                       | 70.3                | 0.997        | 0.721 – 1.379        | 0.986             |
|                                     | Employed in animal<br>care/veterinary sector (n = 891) | No                 | 579; 250                      | 69.8                |              | Ref                  |                   |
|                                     |                                                        | Yes                | 48; 14                        | 77.4                | 1.480        | 0.802 – 2.734        | 0.210             |
|                                     | Another dog(s) in household (in<br>2020) (n = 881)     | No                 | 465; 174                      | 72.8                |              | Ref                  |                   |
|                                     |                                                        | Yes                | <b>157; 85</b>                | <b>64.9</b>         | <b>0.691</b> | <b>0.504 – 0.948</b> | <b>0.022</b>      |

Table S5. Contd...

|                                              | Variable                                                                 | Category                             | <i>n</i><br>(professional;<br>other) | %<br>(professional) | Odds Ratio   | 95% CI*              | <i>p</i> -Value |
|----------------------------------------------|--------------------------------------------------------------------------|--------------------------------------|--------------------------------------|---------------------|--------------|----------------------|-----------------|
| <b>Owner/<br/>household<br/>demographics</b> | Current working location of owner<br>( <i>n</i> = 863)                   | At home                              | 149; 49                              | 75.3                | 1.119        | 0.733 – 1.706        | 0.603           |
|                                              |                                                                          | Away from home                       | 126; 58                              | 68.5                | 0.799        | 0.529 – 1.208        | 0.288           |
|                                              |                                                                          | At and away from home                | 193; 71                              | 73.1                |              | Ref                  |                 |
|                                              |                                                                          | Unemployed                           | 23; 7                                | 76.7                | 1.209        | 0.497 – 2.940        | 0.676           |
|                                              |                                                                          | <b>Retired</b>                       | <b>120; 67</b>                       | <b>64.2</b>         | <b>0.659</b> | <b>0.440 – 0.987</b> | <b>0.043</b>    |
|                                              | Current working location of other<br>household members ( <i>n</i> = 751) | At home                              | 103; 39                              | 72.5                | 0.886        | 0.551 – 1.424        | 0.616           |
|                                              |                                                                          | Away from home                       | 174; 73                              | 70.4                | 0.799        | 0.533 – 1.199        | 0.279           |
|                                              |                                                                          | At and away from home                | 170; 57                              | 74.9                |              | Ref                  |                 |
|                                              |                                                                          | Unemployed                           | 7; 3                                 | 70.0                | 0.782        | 0.196 – 3.127        | 0.728           |
|                                              |                                                                          | Retired                              | 83; 42                               | 66.4                | 0.663        | 0.411 – 1.068        | 0.091           |
| <b>Dog<br/>demographics</b>                  | Owner lives alone/only adult in the<br>household ( <i>n</i> = 864)       | No                                   | 532; 213                             | 71.4                |              | Ref                  |                 |
|                                              |                                                                          | Yes                                  | 79; 40                               | 66.4                | 0.791        | 0.524 – 1.194        | 0.264           |
|                                              | Dog sex<br>( <i>n</i> = 890)                                             | Female                               | 290; 131                             | 68.9                |              | Ref                  |                 |
|                                              |                                                                          | Male                                 | 336; 28.4                            | 71.6                | 1.141        | 0.856 – 1.522        | 0.369           |
|                                              | Neutered<br>( <i>n</i> = 891)                                            | No                                   | 247; 122                             | 66.9                |              | Ref                  |                 |
|                                              |                                                                          | Yes                                  | 380; 142                             | 72.8                | 1.322        | 0.898 – 1.767        | 0.060           |
|                                              | Breed purity designation<br>( <i>n</i> = 891)                            | Crossbred                            | 26; 12                               | 68.4                |              | Ref                  |                 |
|                                              |                                                                          | Purebred                             | 440; 176                             | 71.4                | 1.154        | 0.570 – 2.042        | 0.691           |
|                                              |                                                                          | Designer Crossbred                   | 161; 76                              | 67.9                | 0.978        | 0.468 – 2.042        | 0.952           |
|                                              | Top 12 most common breeds at 21<br>months ( <i>n</i> = 891)              | Crossbred                            | 26; 12                               | 68.4                |              | Ref                  |                 |
|                                              |                                                                          | Cockapoo                             | 62; 22                               | 73.8                | 1.301        | 0.562 – 3.011        | 0.539           |
|                                              |                                                                          | Labradoodle                          | 16; 10                               | 61.5                | 0.738        | 0.260 – 2.100        | 0.570           |
|                                              |                                                                          | Cavapoo                              | 14; 4                                | 77.8                | 1.615        | 0.438 – 5.956        | 0.471           |
|                                              |                                                                          | Labrador Retriever                   | 72; 23                               | 75.8                | 1.445        | 0.630 – 3.312        | 0.385           |
|                                              |                                                                          | Cocker Spaniel                       | 44; 18                               | 71.0                | 1.128        | 0.470 – 2.711        | 0.787           |
|                                              |                                                                          | Border Collie                        | 24; 8                                | 75.0                | 1.385        | 0.483 – 3.967        | 0.545           |
|                                              |                                                                          | Miniature Smooth-Haired<br>Dachshund | 19; 8                                | 70.4                | 1.096        | 0.375 – 3.204        | 0.867           |
|                                              |                                                                          | Border Terrier                       | 16; 10                               | 61.5                | 0.738        | 0.260 – 2.100        | 0.570           |
|                                              |                                                                          | Golden Retriever                     | 22; 5                                | 81.5                | 2.031        | 0.619 – 6.660        | 0.242           |
|                                              |                                                                          | Whippet                              | 16; 5                                | 76.2                | 1.477        | 0.438 – 4.978        | 0.529           |
|                                              |                                                                          | English Springer Spaniel             | 18; 0                                | 100.0               | ~            | ~                    | ~               |
|                                              |                                                                          | Other                                | 278; 139                             | 66.7                | 0.923        | 0.452 – 1.884        | 0.826           |

Table S5. Contd...

|                                                 | Variable                                                           | Category          | <i>n</i><br>(professional;<br>other) | %<br>(professional) | Odds Ratio   | 95% CI*              | <i>p</i> -Value   |
|-------------------------------------------------|--------------------------------------------------------------------|-------------------|--------------------------------------|---------------------|--------------|----------------------|-------------------|
| Dog demographics                                | Breed group<br>( <i>n</i> = 891)                                   | Not KC recognised | 195; 88                              | 68.9                |              | Ref                  |                   |
|                                                 |                                                                    | <b>Gundog</b>     | <b>199; 60</b>                       | <b>76.8</b>         | <b>1.497</b> | <b>1.021 – 2.195</b> | <b>0.039</b>      |
|                                                 |                                                                    | Hound             | 58; 26                               | 69.0                | 1.007        | 0.595 – 1.705        | 0.980             |
|                                                 |                                                                    | Pastoral          | 44; 18                               | 71.0                | 1.103        | 0.603 – 2.017        | 0.750             |
|                                                 |                                                                    | Terrier           | 54; 29                               | 65.1                | 0.840        | 0.501 – 1.409        | 0.509             |
|                                                 |                                                                    | Toy               | 16; 8                                | 66.7                | 0.903        | 0.372 – 2.187        | 0.820             |
|                                                 |                                                                    | Utility           | 39; 23                               | 62.9                | 0.765        | 0.431 – 1.358        | 0.360             |
|                                                 |                                                                    | Working           | 22; 12                               | 64.7                | 0.827        | 0.392 – 1.746        | 0.619             |
|                                                 | Typical adult bodyweight<br>( <i>n</i> = 860)                      | ≤ 10 kg           | 123; 51                              | 70.7                | 1.042        | 0.699 – 1.553        | 0.839             |
|                                                 |                                                                    | 10 to < 20 kg     | 243; 105                             | 69.8                |              | Ref                  |                   |
|                                                 |                                                                    | 20 to < 30 kg     | 146; 53                              | 73.4                | 1.190        | 0.807 – 1.756        | 0.380             |
|                                                 |                                                                    | 30 to < 40 kg     | 89; 36                               | 71.2                | 1.068        | 0.681 – 1.675        | 0.774             |
|                                                 |                                                                    | ≥ 40 kg           | 7; 7                                 | 50.0                | 0.432        | 0.148 – 1.263        | 0.125             |
|                                                 | Insured ( <i>n</i> = 891)                                          | No                | 76; 36                               | 67.9                |              | Ref                  |                   |
|                                                 |                                                                    | Yes               | 551; 228                             | 70.7                | 1.145        | 0.748 – 1.752        | 0.534             |
| Purchase motivations for a dog/for breed chosen | Dog to improve mental health<br>( <i>n</i> = 891)                  | No                | 307; 143                             | 68.2                |              | Ref                  |                   |
|                                                 |                                                                    | Yes               | 320; 121                             | 72.6                | 1.232        | 0.923 – 1.644        | 0.156             |
|                                                 | Breed size suited to my lifestyle<br>( <i>n</i> = 891)             | No                | 190; 94                              | 66.9                |              | Ref                  |                   |
|                                                 |                                                                    | Yes               | 437; 170                             | 72.0                | 1.272        | 0.938 – 1.724        | 0.121             |
|                                                 | Breed good with children<br>( <i>n</i> = 891)                      | No                | 347; 142                             | 71.0                |              | Ref                  |                   |
|                                                 |                                                                    | Yes               | 280; 122                             | 69.7                | 0.939        | 0.704 – 1.254        | 0.670             |
|                                                 | Breed easy to train<br>( <i>n</i> = 891)                           | No                | 313; 153                             | 67.2                |              | Ref                  |                   |
|                                                 |                                                                    | <b>Yes</b>        | <b>314; 111</b>                      | <b>73.9</b>         | <b>1.383</b> | <b>1.034 – 1.848</b> | <b>0.029</b>      |
|                                                 | Friends or family own this breed/crossbreed ( <i>n</i> = 891)      | No                | 468; 210                             | 69.0                |              | Ref                  |                   |
|                                                 |                                                                    | Yes               | 159; 54                              | 74.6                | 1.321        | 0.932 – 1.873        | 0.118             |
| Pre-purchase research                           | Respondent driving force to get a dog ( <i>n</i> = 873)            | No                | 353; 161                             | 68.7                |              | Ref                  |                   |
|                                                 |                                                                    | Yes               | 263; 96                              | 73.3                | 1.249        | 0.927 – 1.685        | 0.144             |
|                                                 | Had more time for a dog due to COVID-19 pandemic ( <i>n</i> = 363) | No                | 26; 24                               | 52.0                |              | Ref                  |                   |
|                                                 |                                                                    | <b>Yes</b>        | <b>243; 70</b>                       | <b>77.6</b>         | <b>3.204</b> | <b>1.732 – 5.928</b> | <b>&lt; 0.001</b> |
| Pre-purchase research                           | Research conducted ( <i>n</i> = 889)                               | No                | 233; 142                             | 62.1                |              | Ref                  |                   |
|                                                 |                                                                    | <b>Yes</b>        | <b>392; 122</b>                      | <b>76.3</b>         | <b>1.958</b> | <b>1.463 – 2.620</b> | <b>&lt; 0.001</b> |

Table S5. Contd...

|                                             | Variable                                                       | Category                      | <i>n</i><br>(professional;<br>other) | %<br>(professional) | Odds Ratio    | 95% CI*               | <i>p</i> -Value   |
|---------------------------------------------|----------------------------------------------------------------|-------------------------------|--------------------------------------|---------------------|---------------|-----------------------|-------------------|
| <b>Purchase behaviours</b>                  | Via animal-specific selling website<br>( <i>n</i> = 890)       | No                            | 312; 123                             | 71.7                |               | Ref                   |                   |
|                                             |                                                                | Yes                           | 314; 141                             | 69.0                | 0.878         | 0.658 – 1.171         | 0.376             |
|                                             | Viewed in person prior to purchase<br>( <i>n</i> = 891)        | No                            | 189; 84                              | 69.2                |               | Ref                   |                   |
|                                             |                                                                | Yes                           | 438; 180                             | 70.9                | 1.081         | 0.793 – 1.475         | 0.621             |
| <b>Potentially illegal sales indicators</b> | Sold without dam present<br>( <i>n</i> = 889)                  | No                            | 481; 219                             | 68.7                |               | Ref                   |                   |
|                                             |                                                                | <b>Yes</b>                    | <b>145; 44</b>                       | <b>76.7</b>         | <b>1.500</b>  | <b>1.033 – 2.179</b>  | <b>0.033</b>      |
|                                             | Sold outside breeders' home<br>( <i>n</i> = 891)               | No                            | 392; 165                             | 70.4                |               | Ref                   |                   |
|                                             |                                                                | Yes                           | 235; 99                              | 70.4                | 0.999         | 0.742 – 1.345         | 0.996             |
|                                             | Sold without a microchip ( <i>n</i> = 874)                     | No                            | 593; 243                             | 70.9                |               | Ref                   |                   |
|                                             |                                                                | Yes                           | 22; 16                               | 57.9                | 0.563         | 0.291 – 1.091         | 0.089             |
|                                             | Sold < 6 weeks of age ( <i>n</i> = 890)                        | No                            | 624; 264                             | 70.3                |               | Ref                   |                   |
|                                             |                                                                | Yes                           | 2; 0                                 | 100.0               | ~             | ~                     | ~                 |
| <b>Owner expectations</b>                   | Behaviour ( <i>n</i> = 876)                                    | As expected/better            | 500; 244                             | 67.2                |               | Ref                   |                   |
|                                             |                                                                | <b>Worse</b>                  | <b>115; 17</b>                       | <b>87.1</b>         | <b>3.301</b>  | <b>1.940 – 5.619</b>  | <b>&lt; 0.001</b> |
|                                             | Training/maintaining obedience<br>( <i>n</i> = 886)            | As expected/easier            | 371; 219                             | 62.9                |               | Ref                   |                   |
|                                             |                                                                | <b>Harder</b>                 | <b>252; 44</b>                       | <b>85.1</b>         | <b>3.381</b>  | <b>2.356 – 4.851</b>  | <b>&lt; 0.001</b> |
| <b>Socialisation &lt; 16 weeks</b>          | Attended puppy classes<br>( <i>n</i> = 890)                    | No                            | 311; 202                             | 60.6                |               | Ref                   |                   |
|                                             |                                                                | <b>Yes, in person</b>         | <b>255; 52</b>                       | <b>83.1</b>         | <b>3.185</b>  | <b>2.252 – 4.506</b>  | <b>&lt; 0.001</b> |
|                                             |                                                                | <b>Yes, online</b>            | <b>61; 9</b>                         | <b>87.1</b>         | <b>4.402</b>  | <b>2.139 – 9.062</b>  | <b>&lt; 0.001</b> |
| <b>Adult management</b>                     | Attended adult classes<br>( <i>n</i> = 891)                    | No                            | 262; 228                             | 53.5                |               | Ref                   |                   |
|                                             |                                                                | <b>Yes, in person</b>         | <b>332; 34</b>                       | <b>90.7</b>         | <b>8.498</b>  | <b>5.724 – 12.614</b> | <b>&lt; 0.001</b> |
|                                             |                                                                | <b>Yes, online</b>            | <b>33; 2</b>                         | <b>94.3</b>         | <b>14.359</b> | <b>3.408 – 60.500</b> | <b>&lt; 0.001</b> |
|                                             | Owner training method<br>( <i>n</i> = 864)                     | Rewards-based only            | 107; 48                              | 69.0                |               | Ref                   |                   |
|                                             |                                                                | Rewards-based & 1 aversive    | 125; 56                              | 69.1                | 1.001         | 0.630 – 1.592         | 0.996             |
|                                             |                                                                | Rewards-based & > 1 aversive  | 612; 252                             | 72.0                | 1.152         | 0.780 – 1.701         | 0.477             |
|                                             |                                                                | Aversive only                 | 0; 0                                 | 0.0                 | ~             | ~                     | ~                 |
|                                             | Change in time left alone from<br>< 16 weeks ( <i>n</i> = 856) | Same amount of time           | 233; 122                             | 65.6                |               | Ref                   |                   |
|                                             |                                                                | Less time                     | 21; 6                                | 77.8                | 1.833         | 0.721 – 4.660         | 0.203             |
|                                             |                                                                | <b>More time ≤ 4 hours</b>    | <b>272; 98</b>                       | <b>73.5</b>         | <b>1.453</b>  | <b>1.057 – 1.998</b>  | <b>0.021</b>      |
|                                             |                                                                | <b>More time &gt; 4 hours</b> | <b>79; 25</b>                        | <b>76.0</b>         | <b>1.655</b>  | <b>1.003 – 2.729</b>  | <b>0.049</b>      |

Table S5. Contd...

|                      | Variable                                                                | Category         | <i>n</i><br>(professional;<br>other) | %<br>(professional) | Odds Ratio   | 95% CI*                     | <i>p</i> -Value   |
|----------------------|-------------------------------------------------------------------------|------------------|--------------------------------------|---------------------|--------------|-----------------------------|-------------------|
| <b>Dog behaviour</b> | Total number of owner-reported undesirable behaviours ( <i>n</i> = 781) | /                | /                                    | /                   | <b>1.162</b> | <b>1.097 – 1.230</b>        | <b>&lt; 0.001</b> |
|                      | Control behaviour score<br>( <i>n</i> = 868)                            | 0<br><b>1+</b>   | 80; 55<br><b>530; 203</b>            | 59.3<br><b>72.3</b> | <b>1.795</b> | Ref<br><b>1.228 – 2.623</b> | <b>0.003</b>      |
|                      | Attention seeking behaviour score<br>( <i>n</i> = 829)                  | 0<br><b>1+</b>   | 114; 74<br><b>468; 173</b>           | 60.6<br><b>73.0</b> | <b>1.756</b> | Ref<br><b>1.249 – 2.469</b> | <b>0.001</b>      |
|                      | Aggressive behaviour score<br>( <i>n</i> = 880)                         | 0<br><b>1+</b>   | 447; 211<br><b>173; 49</b>           | 67.9<br><b>77.9</b> | <b>1.667</b> | Ref<br><b>1.166 – 2.381</b> | <b>0.005</b>      |
|                      | Fear/avoidance behaviour score<br>( <i>n</i> = 875)                     | 0<br><b>1+</b>   | 342; 171<br><b>277; 85</b>           | 66.7<br><b>76.5</b> | <b>1.629</b> | Ref<br><b>1.202 – 2.210</b> | <b>0.002</b>      |
|                      | Reaction to familiar people<br>( <i>n</i> = 881)                        | 0<br><b>1+</b>   | 582; 247<br>41; 11                   | 70.2<br>78.8        | 1.582        | Ref<br>0.800 – 3.129        | 0.188             |
|                      | Reaction to unfamiliar people<br>( <i>n</i> = 886)                      | 0<br><b>1+</b>   | 484; 216<br>141; 45                  | 69.1<br>75.8        | 1.398        | Ref<br>0.964 – 2.028        | 0.077             |
|                      | Reaction to other dogs<br>( <i>n</i> = 882)                             | 0<br><b>1+</b>   | 472; 220<br><b>149; 41</b>           | 68.2<br><b>78.4</b> | <b>1.694</b> | Ref<br><b>1.157 – 2.479</b> | <b>0.007</b>      |
|                      | SRB case<br>( <i>n</i> = 778)                                           | No<br><b>Yes</b> | 364; 176<br><b>180; 58</b>           | 67.4<br><b>75.6</b> | <b>1.501</b> | Ref<br><b>1.061 – 2.122</b> | <b>0.022</b>      |



## Supplementary Table S6: Owner expectations of behaviour, descriptive and univariate logistic regression analysis

**Table S6.** Descriptive and univariable analysis of categorical variables and owner expectations of their dog's behaviour at acquisition versus at 21 months.

Descriptive and univariable binary logistic regression analysis of dogs whose owners responded to the question “Compared to my expectations when I first acquired my dog, their behaviour since the last survey (in November/December 2020) has been...”. Responses were categorised as a binary outcome as to whether expectations had been met where “Worse than expected” were coded separately from “As expected” and “Better than expected”, which were coded together as one outcome. Owners who had answered “I’m not sure” were reclassified as missing data. \*95% confidence interval. Significant results are emboldened. ~ No analysis possible.

|                                     | Variable                                               | Category              | n (worse; better/as) | % (worse)   | Odds Ratio   | 95% CI*              | p-Value      |
|-------------------------------------|--------------------------------------------------------|-----------------------|----------------------|-------------|--------------|----------------------|--------------|
| Owner/<br>household<br>demographics | First-time dog owner<br>(n = 886)                      | No                    | 72; 474              | 13.2        |              | Ref                  |              |
|                                     |                                                        | Yes                   | 60; 280              | 17.6        | 1.411        | 0.971 – 2.049        | 0.071        |
|                                     | Owner age<br>(n = 885)                                 | 18-24 years           | 8; 29                | 21.6        | 1.986        | 0.831 – 4.745        | 0.123        |
|                                     |                                                        | <b>25-34 years</b>    | <b>36; 131</b>       | <b>21.6</b> | <b>1.979</b> | <b>1.164 – 3.365</b> | <b>0.012</b> |
|                                     |                                                        | 35-44 years           | 20; 145              | 12.1        | 0.993        | 0.543 – 1.816        | 0.982        |
|                                     |                                                        | 45-54 years           | 30; 216              | 12.2        |              | Ref                  |              |
|                                     |                                                        | 55-64 years           | 26; 138              | 15.9        | 1.357        | 0.770 – 2.391        | 0.292        |
|                                     |                                                        | 65-74 years           | 8; 85                | 8.6         | 0.678        | 0.299 – 1.537        | 0.352        |
|                                     |                                                        | ≥ 75 years            | 4; 9                 | 30.8        | 3.200        | 0.928 – 11.038       | 0.066        |
|                                     | Owner gender (n = 886)                                 | Female                | 122; 682             | 15.2        |              | Ref                  |              |
|                                     |                                                        | Male                  | 10; 72               | 12.2        | 0.776        | 0.390 – 1.546        | 0.472        |
|                                     | Child ≤ 16 years in household<br>(in 2020; n = 886)    | No                    | 100; 548             | 15.4        |              | Ref                  |              |
|                                     |                                                        | Yes                   | 31; 207              | 13.0        | 0.821        | 0.532 – 1.266        | 0.372        |
|                                     | Employed in animal<br>care/veterinary sector (n = 887) | No                    | 123; 702             | 14.9        |              | Ref                  |              |
|                                     |                                                        | Yes                   | 9; 53                | 14.5        | 0.969        | 0.466 – 2.015        | 0.933        |
|                                     | Another dog(s) in household (in<br>2020) (n = 877)     | No                    | 103; 532             | 16.2        |              | Ref                  |              |
|                                     |                                                        | Yes                   | 29; 213              | 12.0        | 0.703        | 0.452- 1.094         | 0.118        |
|                                     | Current working location of owner<br>(n = 864)         | At home               | 30; 169              | 15.1        | 1.094        | 0.650 – 1.842        | 0.736        |
|                                     |                                                        | Away from home        | 24; 158              | 13.2        | 0.936        | 0.539 – 1.626        | 0.815        |
|                                     |                                                        | At and away from home | 37; 228              | 14.0        |              | Ref                  |              |
|                                     |                                                        | Unemployed            | 7; 23                | 23.3        | 1.875        | 0.751 – 4.681        | 0.178        |
|                                     |                                                        | Retired               | 31; 157              | 16.5        | 1.217        | 0.724 – 2.044        | 0.459        |

Table S6. Contd...

|                                              | Variable                                                                 | Category                             | <i>n</i> (worse;<br>better/as) | % (worse)   | Odds Ratio   | 95% CI*              | <i>p</i> -Value |
|----------------------------------------------|--------------------------------------------------------------------------|--------------------------------------|--------------------------------|-------------|--------------|----------------------|-----------------|
| <b>Owner/<br/>household<br/>demographics</b> | Current working location of other<br>household members ( <i>n</i> = 755) | At home                              | 21; 124                        | 14.5        | 0.792        | 0.446 – 1.407        | 0.426           |
|                                              |                                                                          | Away from home                       | 31; 216                        | 12.6        | 0.671        | 0.404 – 1.115        | 0.124           |
|                                              |                                                                          | At and away from home                | 40; 187                        | 17.6        | Ref          |                      |                 |
|                                              |                                                                          | Unemployed                           | 2; 8                           | 20.0        | 1.169        | 0.239 – 5.712        | 0.847           |
|                                              |                                                                          | Retired                              | 18; 108                        | 14.3        | 0.779        | 0.426 – 1.426        | 0.419           |
|                                              | Owner lives alone/only adult in the<br>household ( <i>n</i> = 865)       | No                                   | 109; 640                       | 14.6        | Ref          |                      |                 |
|                                              |                                                                          | Yes                                  | 20; 96                         | 17.2        | 1.223        | 0.725 – 2.063        | 0.450           |
| <b>Dog<br/>demographics</b>                  | Dog sex<br>( <i>n</i> = 886)                                             | Female                               | 50; 365                        | 12.0        | Ref          |                      |                 |
|                                              |                                                                          | <b>Male</b>                          | <b>82; 289</b>                 | <b>17.4</b> | <b>1.539</b> | <b>1.053 – 2.249</b> | <b>0.026</b>    |
|                                              | Neutered<br>( <i>n</i> = 887)                                            | No                                   | 49; 318                        | 13.4        | Ref          |                      |                 |
|                                              |                                                                          | Yes                                  | 83; 437                        | 16.0        | 1.233        | 0.842 – 1.805        | 0.283           |
|                                              | Breed purity designation<br>( <i>n</i> = 887)                            | Crossbred                            | 8; 31                          | 20.5        | Ref          |                      |                 |
|                                              |                                                                          | Purebred                             | 93; 516                        | 15.3        | 0.698        | 0.311 – 1.567        | 0.384           |
|                                              |                                                                          | Designer Crossbred                   | 31; 208                        | 13.0        | 0.578        | 0.243 – 1.370        | 0.213           |
|                                              | Top 12 most common breeds at 21<br>months ( <i>n</i> = 887)              | Crossbred                            | 8; 31                          | 20.5        | Ref          |                      |                 |
|                                              |                                                                          | Cockapoo                             | 10; 74                         | 11.9        | 0.524        | 0.189 – 1.452        | 0.214           |
|                                              |                                                                          | Labradoodle                          | 5; 21                          | 19.2        | 0.923        | 0.265 – 3.211        | 0.899           |
|                                              |                                                                          | Cavapoo                              | 1; 17                          | 5.6         | 0.228        | 0.026 – 1.979        | 0.180           |
|                                              |                                                                          | Labrador Retriever                   | 13; 82                         | 13.7        | 0.614        | 0.232 – 1.625        | 0.326           |
|                                              |                                                                          | <b>Cocker Spaniel</b>                | <b>4; 57</b>                   | <b>6.6</b>  | <b>0.272</b> | <b>0.076 – 0.976</b> | <b>0.046</b>    |
|                                              |                                                                          | Border Collie                        | 8; 24                          | 25.0        | 1.292        | 0.423 – 3.941        | 0.653           |
|                                              |                                                                          | Miniature Smooth-Haired<br>Dachshund | 5; 21                          | 19.2        | 0.923        | 0.265 – 3.211        | 0.899           |
|                                              |                                                                          | Border Terrier                       | 2; 23                          | 8.0         | 0.337        | 0.065 – 1.738        | 0.194           |
|                                              |                                                                          | Golden Retriever                     | 4; 24                          | 14.3        | 0.646        | 0.174 – 2.401        | 0.514           |
|                                              |                                                                          | Whippet                              | 1; 20                          | 4.8         | 0.194        | 0.022 – 1.669        | 0.135           |
|                                              |                                                                          | English Springer Spaniel             | 2; 18                          | 10.0        | 0.431        | 0.082 – 2.253        | 0.318           |
|                                              |                                                                          | Other                                | 69; 343                        | 16.7        | 0.780        | 0.344 – 1.768        | 0.551           |

Table S6. Contd...

|                                                                    | Variable                                                         | Category          | <i>n</i> (worse;<br>better/as) | % (worse) | Odds Ratio | 95% CI*        | <i>p</i> -Value |
|--------------------------------------------------------------------|------------------------------------------------------------------|-------------------|--------------------------------|-----------|------------|----------------|-----------------|
| <b>Dog<br/>demographics</b>                                        | Breed group<br>( <i>n</i> = 887)                                 | Not KC recognised | 44; 244                        | 14.7      |            | Ref            |                 |
|                                                                    |                                                                  | Gundog            | 30; 230                        | 11.5      | 0.758      | 0.459 – 1.252  | 0.279           |
|                                                                    |                                                                  | Hound             | 13; 68                         | 16.0      | 1.111      | 0.564 – 2.187  | 0.761           |
|                                                                    |                                                                  | Pastoral          | 15; 48                         | 23.8      | 1.815      | 0.933 – 3.533  | 0.079           |
|                                                                    |                                                                  | Terrier           | 13; 67                         | 16.3      | 1.127      | 0.572 – 2.221  | 0.729           |
|                                                                    |                                                                  | Toy               | 5; 19                          | 20.8      | 1.529      | 0.541 – 4.317  | 0.423           |
|                                                                    |                                                                  | Utility           | 8; 51                          | 13.6      | 0.911      | 0.404 – 2.057  | 0.823           |
|                                                                    |                                                                  | Working           | 6; 28                          | 17.6      | 1.245      | 0.486 – 3.189  | 0.648           |
|                                                                    | Typical adult bodyweight<br>( <i>n</i> = 853)                    | ≤ 10 kg           | 28; 138                        | 16.9      | 1.371      | 0.821 – 2.289  | 0.228           |
|                                                                    |                                                                  | 10 to < 20 kg     | 45; 304                        | 12.9      |            | Ref            |                 |
|                                                                    |                                                                  | 20 to < 30 kg     | 28; 170                        | 14.1      | 1.113      | 0.670 – 1.849  | 0.680           |
|                                                                    |                                                                  | 30 to < 40 kg     | 21; 105                        | 16.7      | 1.351      | 0.769 – 2.374  | 0.295           |
|                                                                    |                                                                  | ≥ 40 kg           | 5; 9                           | 35.7      | 3.753      | 1.204 – 11.702 | 0.023           |
| <b>Purchase<br/>motivations for<br/>a dog/for<br/>breed chosen</b> | Dog to improve mental health<br>( <i>n</i> = 887)                | No                | 63; 384                        | 14.1      |            | Ref            |                 |
|                                                                    |                                                                  | Yes               | 69; 371                        | 15.7      | 1.134      | 0.783 – 1.641  | 0.507           |
|                                                                    | Breed size suited to my lifestyle<br>( <i>n</i> = 887)           | No                | 42; 240                        | 14.9      |            | Ref            |                 |
|                                                                    |                                                                  | Yes               | 90; 515                        | 14.9      | 0.999      | 0.671 – 1.485  | 0.995           |
|                                                                    | Breed good with children<br>( <i>n</i> = 887)                    | No                | 76; 411                        | 15.6      |            | Ref            |                 |
|                                                                    |                                                                  | Yes               | 56; 344                        | 14.0      | 0.880      | 0.606 – 1.279  | 0.504           |
|                                                                    | Breed easy to train<br>( <i>n</i> = 887)                         | No                | 67; 394                        | 14.5      |            | Ref            |                 |
|                                                                    |                                                                  | Yes               | 65; 361                        | 15.3      | 1.059      | 0.731 – 1.533  | 0.762           |
|                                                                    | Friends or family own this<br>breed/crossbreed ( <i>n</i> = 887) | No                | 103; 571                       | 15.3      |            | Ref            |                 |
|                                                                    |                                                                  | Yes               | 29; 184                        | 13.6      | 0.874      | 0.560 – 1.362  | 0.552           |
|                                                                    | Respondent driving force to get a<br>dog ( <i>n</i> = 869)       | No                | 69; 444                        | 13.5      |            | Ref            |                 |
|                                                                    |                                                                  | Yes               | 61; 295                        | 17.1      | 1.331      | 0.915 – 1.935  | 0.135           |
| <b>Pre-purchase<br/>research</b>                                   | Research conducted ( <i>n</i> = 885)                             | No                | 8; 41                          | 16.3      |            | Ref            |                 |
|                                                                    |                                                                  | Yes               | 53; 259                        | 17.0      | 1.049      | 0.465 – 2.365  | 0.909           |
| <b>Purchase<br/>behaviours</b>                                     | Research conducted ( <i>n</i> = 885)                             | No                | 46; 327                        | 12.3      |            | Ref            |                 |
|                                                                    |                                                                  | Yes               | 86; 426                        | 16.8      | 1.435      | 0.976 – 2.111  | 0.067           |
|                                                                    | Via animal-specific selling website<br>( <i>n</i> = 886)         | No                | 64; 368                        | 14.8      |            | Ref            |                 |
|                                                                    |                                                                  | Yes               | 68; 386                        | 15.0      | 1.013      | 0.700 – 1.466  | 0.946           |
|                                                                    | Viewed in person prior to purchase<br>( <i>n</i> = 887)          | No                | 35; 235                        | 13.0      |            | Ref            |                 |
|                                                                    |                                                                  | Yes               | 97; 520                        | 15.7      | 1.252      | 0.826 – 1.899  | 0.289           |

Table S6. Contd...

|                                                     | Variable                                           | Category                     | <i>n</i> (worse;<br>better/as) | % (worse) | Odds Ratio | 95% CI*        | <i>p</i> -Value |
|-----------------------------------------------------|----------------------------------------------------|------------------------------|--------------------------------|-----------|------------|----------------|-----------------|
| <b>Potentially<br/>illegal sales<br/>indicators</b> | Sold without dam present<br>( <i>n</i> = 885)      | No                           | 97; 599                        | 13.9      |            | Ref            |                 |
|                                                     |                                                    | Yes                          | 35; 154                        | 18.5      | 1.403      | 0.917 – 2.147  | 0.118           |
|                                                     | Sold outside breeders' home<br>( <i>n</i> = 887)   | No                           | 77; 480                        | 13.8      |            | Ref            |                 |
|                                                     |                                                    | Yes                          | 55; 275                        | 16.7      | 1.247      | 0.856 – 1.817  | 0.251           |
|                                                     | Sold without a microchip ( <i>n</i> = 870)         | No                           | 121; 710                       | 14.6      |            | Ref            |                 |
|                                                     |                                                    | Yes                          | 8; 31                          | 20.5      | 1.514      | 0.680 – 3.373  | 0.310           |
|                                                     | Sold < 6 weeks of age ( <i>n</i> = 886)            | No                           | 132; 752                       | 14.9      |            | Ref            |                 |
|                                                     |                                                    | Yes                          | 0; 2                           | 0.0       | ~          | ~              | ~               |
| <b>Socialisation<br/>&lt; 16 weeks</b>              | Attended puppy classes<br>( <i>n</i> = 886)        | No                           | 115; 642                       | 15.2      |            | Ref            |                 |
|                                                     |                                                    | Yes                          | 8; 39                          | 17.0      | 1.145      | 0.522 – 2.514  | 0.735           |
|                                                     |                                                    | Yes, in person               | 50; 254                        | 16.4      | 1.225      | 0.827 – 1.816  | 0.311           |
|                                                     |                                                    | Yes, online                  | 11; 58                         | 15.9      | 1.181      | 0.591 – 2.358  | 0.638           |
| <b>Adult<br/>management</b>                         | Attended adult classes<br>( <i>n</i> = 887)        | No                           | 50; 439                        | 10.2      |            | Ref            |                 |
|                                                     |                                                    | Yes, in person               | 71; 292                        | 19.6      | 2.135      | 1.444 – 3.156  | < 0.001         |
|                                                     |                                                    | Yes, online                  | 11; 24                         | 31.4      | 4.024      | 1.861 – 8.702  | < 0.001         |
|                                                     |                                                    |                              |                                |           |            |                |                 |
|                                                     | Owner training method<br>( <i>n</i> = 860)         | Rewards-based only           | 17; 135                        | 11.2      |            | Ref            |                 |
|                                                     |                                                    | Rewards-based & 1 aversive   | 20; 160                        | 11.1      | 0.993      | 0.500 – 1.971  | 0.983           |
|                                                     |                                                    | Rewards-based & > 1 aversive | 95; 433                        | 18.0      | 1.742      | 1.004 – 3.023  | 0.048           |
|                                                     |                                                    | Aversive only                | 0; 0                           | 0.0       | ~          | ~              | ~               |
|                                                     | Exercise frequency (walks)<br>( <i>n</i> = 876)    | Never                        | 0; 1                           | 0.0       | ~          | ~              | ~               |
|                                                     |                                                    | < Once a week                | 1; 2                           | 33.3      | 2.508      | 0.224 – 28.058 | 0.456           |
|                                                     |                                                    | Once a week                  | 0; 3                           | 0.0       | ~          | ~              | ~               |
|                                                     |                                                    | Several times per week       | 5; 42                          | 10.6      | 0.597      | 0.228 – 1.566  | 0.294           |
|                                                     |                                                    | Once per day                 | 38; 196                        | 16.2      | 0.972      | 0.628 – 1.504  | 0.900           |
|                                                     |                                                    | Twice per day                | 66; 331                        | 16.6      |            | Ref            |                 |
|                                                     |                                                    | > Twice per day              | 20; 171                        | 10.5      | 0.587      | 0.344 – 1.000  | 0.050           |
|                                                     |                                                    |                              |                                |           |            |                |                 |
|                                                     | Exercise frequency<br>(off lead) ( <i>n</i> = 874) | Never                        | 11; 40                         | 21.6      | 1.400      | 0.667 – 2.939  | 0.374           |
|                                                     |                                                    | < Once a week                | 5; 24                          | 17.2      | 1.061      | 0.384 – 2.930  | 0.910           |
|                                                     |                                                    | Once a week                  | 8; 19                          | 29.6      | 2.144      | 0.883 – 5.204  | 0.092           |
|                                                     |                                                    | Several times per week       | 28; 116                        | 19.4      | 1.229      | 0.728 – 2.076  | 0.441           |
|                                                     |                                                    | Once per day                 | 44; 224                        | 16.4      |            | Ref            |                 |
|                                                     |                                                    | Twice per day                | 24; 198                        | 10.8      | 0.617      | 0.362 – 1.051  | 0.076           |
|                                                     |                                                    | > Twice per day              | 9; 124                         | 6.8       | 0.370      | 0.175 – 0.782  | 0.009           |
|                                                     |                                                    |                              |                                |           |            |                |                 |

Table S6. Contd...

|                     | Variable                                                           | Category                            | n (worse;<br>better/as) | % (worse)   | Odds Ratio   | 95% CI*               | p-Value           |
|---------------------|--------------------------------------------------------------------|-------------------------------------|-------------------------|-------------|--------------|-----------------------|-------------------|
| Adult<br>management | Time left alone (n = 886)                                          | Never                               | 24; 81                  | 22.9        |              | Ref                   |                   |
|                     |                                                                    | Up to 1 hour                        | 32; 127                 | 20.1        | 0.850        | 0.468 – 1.547         | 0.595             |
|                     |                                                                    | <b>1 to 4 hours</b>                 | <b>65; 445</b>          | <b>12.7</b> | <b>0.493</b> | <b>0.292 – 0.833</b>  | <b>0.008</b>      |
|                     |                                                                    | <b>Over 4 hours</b>                 | <b>10; 102</b>          | <b>8.9</b>  | <b>0.331</b> | <b>0.150 – 0.731</b>  | <b>0.006</b>      |
|                     | Change in time left alone from<br>< 16 weeks (n = 856)             | Same amount of time                 | 57; 297                 | 16.1        |              | Ref                   |                   |
|                     |                                                                    | <b>Less time</b>                    | <b>9; 18</b>            | <b>33.3</b> | <b>2.605</b> | <b>1.115 – 6.088</b>  | <b>0.027</b>      |
|                     |                                                                    | More time ≤ 4 hours                 | 51; 322                 | 13.7        | 0.825        | 0.548 – 1.243         | 0.358             |
|                     |                                                                    | More time > 4 hours                 | 12; 90                  | 11.8        | 0.695        | 0.357 – 1.352         | 0.284             |
|                     | Location left alone<br>(n = 849)                                   | A crate/indoor kennel (door closed) | 22; 109                 | 16.8        | 1.232        | 0.728 – 2.085         | 0.437             |
|                     |                                                                    | Loose in a single room              | 36; 203                 | 15.1        | 1.083        | 0.698 – 1.679         | 0.723             |
|                     |                                                                    | Loose in multiple rooms             | 67; 409                 | 14.1        |              | Ref                   |                   |
|                     |                                                                    | Outdoor kennel (door closed)        | 0; 1                    | 0.0         | ~            | ~                     | ~                 |
|                     |                                                                    | Outdoor kennel (door open)          | 0; 1                    | 0.0         | ~            | ~                     | ~                 |
|                     |                                                                    | Loose in an enclosed outdoor space  | 0; 1                    | 0.0         | ~            | ~                     | ~                 |
|                     | General advice source for training<br>and behaviour (n = 876)      | Non-professional                    | 17; 244                 | 6.5         |              | Ref                   |                   |
|                     |                                                                    | <b>Professional</b>                 | <b>115; 500</b>         | <b>18.7</b> | <b>3.301</b> | <b>1.940 – 5.619</b>  | <b>&lt; 0.001</b> |
|                     | Respondent primary carer for dog<br>(n = 886)                      | Shares care                         | 50; 333                 | 13.1        |              | Ref                   |                   |
|                     |                                                                    | No                                  | 2; 2                    | 50.0        | 6.660        | 0.917 – 48.352        | 0.061             |
|                     |                                                                    | Yes                                 | 80; 419                 | 16.0        | 1.272        | 0.868 – 1.862         | 0.217             |
| Dog behaviour       | Total number of owner-reported<br>undesirable behaviours (n = 784) | /                                   | /                       | /           | <b>1.374</b> | <b>1.282 – 1.472</b>  | <b>&lt; 0.001</b> |
|                     |                                                                    | /                                   | /                       | /           |              |                       |                   |
|                     | Control behaviour score<br>(n = 863)                               | 0                                   | 5; 132                  | 3.6         |              | Ref                   |                   |
|                     |                                                                    | <b>1+</b>                           | <b>123; 603</b>         | <b>16.9</b> | <b>5.385</b> | <b>2.159 – 13.429</b> | <b>&lt; 0.001</b> |
|                     | Attention seeking behaviour score<br>(n = 829)                     | 0                                   | 11; 178                 | 5.8         |              | Ref                   |                   |
|                     |                                                                    | <b>1+</b>                           | <b>114; 526</b>         | <b>17.8</b> | <b>3.507</b> | <b>1.846 – 6.663</b>  | <b>&lt; 0.001</b> |
|                     | Aggressive behaviour score<br>(n = 874)                            | 0                                   | 59; 598                 | 9.0         |              | Ref                   |                   |
|                     |                                                                    | <b>1+</b>                           | <b>72; 145</b>          | <b>33.2</b> | <b>5.003</b> | <b>3.411 – 7.427</b>  | <b>&lt; 0.001</b> |
|                     | Fear/avoidance behaviour score<br>(n = 870)                        | 0                                   | 47; 462                 | 9.2         |              | Ref                   |                   |
|                     |                                                                    | <b>1+</b>                           | <b>82; 279</b>          | <b>22.7</b> | <b>2.889</b> | <b>1.960 – 4.259</b>  | <b>&lt; 0.001</b> |
|                     | Reaction to familiar people<br>(n = 876)                           | 0                                   | 107; 718                | 13.0        |              | Ref                   |                   |
|                     |                                                                    | <b>1+</b>                           | <b>24; 27</b>           | <b>47.1</b> | <b>5.965</b> | <b>3.319 – 10.719</b> | <b>&lt; 0.001</b> |
|                     | Reaction to unfamiliar people<br>(n = 880)                         | 0                                   | 82; 612                 | 11.8        |              | Ref                   |                   |
|                     |                                                                    | <b>1+</b>                           | <b>49; 137</b>          | <b>26.3</b> | <b>2.669</b> | <b>1.790 – 3.980</b>  | <b>&lt; 0.001</b> |

Table S6. Contd...

|               | Variable                                    | Category | <i>n</i> (worse;<br>better/as) | % (worse)   | Odds Ratio   | 95% CI*              | <i>p</i> -Value   |
|---------------|---------------------------------------------|----------|--------------------------------|-------------|--------------|----------------------|-------------------|
| Dog behaviour | Reaction to other dogs<br>( <i>n</i> = 877) | 0        | 63; 624                        | 9.2         |              | Ref                  |                   |
|               |                                             | 1+       | <b>67; 123</b>                 | <b>35.3</b> | <b>5.395</b> | <b>3.636 – 8.005</b> | <b>&lt; 0.001</b> |
|               | SRB case<br>( <i>n</i> = 781)               | No       | 71; 469                        | 13.1        |              | Ref                  |                   |
|               |                                             | Yes      | 42; 199                        | 17.4        | 1.394        | 0.920 – 2.113        | 0.117             |

## Supplementary Table S7: Owner expectations of training, descriptive and univariate logistic regression analysis

**Table S7.** Descriptive and univariable analysis of categorical variables and owner expectations of training and maintaining obedience training with their dog at acquisition versus at 21 months.

Descriptive and univariable binary logistic regression analysis of dogs whose owners responded to the question “Compared to my expectations when I first acquired my dog, training and ongoing maintenance of their basic obedience since the last survey (in November/December 2020) has been...”. Responses were categorised as a binary outcome as to whether expectations had been met where “Harder than expected” were coded separately from “As expected” and “Easier than expected”, which were coded together as one outcome. Owners who had answered “I’m not sure” were reclassified as missing data. \*95% confidence interval. Significant results are emboldened. ~ No analysis possible.

|                                     | Variable                                               | Category              | n (harder; easier/as) | % (harder)  | Odds Ratio   | 95% CI*              | p-Value           |
|-------------------------------------|--------------------------------------------------------|-----------------------|-----------------------|-------------|--------------|----------------------|-------------------|
| Owner/<br>household<br>demographics | First-time dog owner<br>(n = 917)                      | No                    | 162; 401              | 28.8        |              | Ref                  |                   |
|                                     |                                                        | Yes                   | <b>142; 212</b>       | <b>40.1</b> | <b>1.658</b> | <b>1.253 – 2.194</b> | <b>&lt; 0.001</b> |
|                                     | Owner age<br>(n = 916)                                 | 18-24 years           | 13; 24                | 35.1        | 1.096        | 0.532 – 2.261        | 0.804             |
|                                     |                                                        | <b>25-34 years</b>    | <b>76; 96</b>         | <b>44.2</b> | <b>1.602</b> | <b>1.075 – 2.387</b> | <b>0.020</b>      |
|                                     |                                                        | 35-44 years           | 45; 128               | 26.0        | 0.711        | 0.463 – 1.092        | 0.120             |
|                                     |                                                        | 45-54 years           | 84; 170               | 33.1        |              | Ref                  |                   |
|                                     |                                                        | 55-64 years           | 53; 117               | 31.2        | 0.917        | 0.604 – 1.391        | 0.683             |
|                                     |                                                        | 65-74 years           | 26; 70                | 27.1        | 0.752        | 0.447 – 1.265        | 0.283             |
|                                     |                                                        | ≥ 75 years            | 6; 8                  | 42.9        | 1.518        | 0.510 – 4.516        | 0.453             |
|                                     | Owner gender (n = 917)                                 | Female                | 276; 555              | 33.2        |              | Ref                  |                   |
|                                     |                                                        | Male                  | 27; 59                | 31.4        | 0.920        | 0.571 – 1.484        | 0.733             |
|                                     | Child ≤ 16 years in household<br>(in 2020; n = 917)    | No                    | 231; 437              | 34.6        |              | Ref                  |                   |
|                                     |                                                        | Yes                   | 73; 176               | 29.3        | 0.785        | 0.572 – 1.076        | 0.133             |
|                                     | Employed in animal<br>care/veterinary sector (n = 918) | No                    | 284; 570              | 33.3        |              | Ref                  |                   |
|                                     |                                                        | Yes                   | 20; 44                | 31.3        | 0.912        | 0.528 – 1.577        | 0.742             |
|                                     | Another dog(s) in household (in<br>2020) (n = 908)     | No                    | 247; 417              | 37.2        |              | Ref                  |                   |
|                                     |                                                        | Yes                   | <b>56; 188</b>        | <b>23.0</b> | <b>0.503</b> | <b>0.359 – 0.705</b> | <b>&lt; 0.001</b> |
|                                     | Current working location of owner<br>(n = 870)         | At home               | 83; 118               | 41.3        | 1.383        | 0.947 – 2.020        | 0.093             |
|                                     |                                                        | Away from home        | 47; 136               | 25.7        | 0.680        | 0.448 – 1.032        | 0.070             |
|                                     |                                                        | At and away from home | 90; 177               | 33.7        |              | Ref                  |                   |
|                                     |                                                        | Unemployed            | 11; 18                | 37.9        | 1.202        | 0.544 – 2.653        | 0.649             |
|                                     |                                                        | Retired               | 59; 131               | 31.1        | 0.886        | 0.595 – 1.319        | 0.551             |

Table S7. Contd...

|                                              | Variable                                                                 | Category                             | <i>n</i> (harder;<br>easier/as) | % (harder)  | Odds Ratio   | 95% CI*              | <i>p</i> -Value   |
|----------------------------------------------|--------------------------------------------------------------------------|--------------------------------------|---------------------------------|-------------|--------------|----------------------|-------------------|
| <b>Owner/<br/>household<br/>demographics</b> | Current working location of other<br>household members ( <i>n</i> = 760) | At home                              | 44; 103                         | 29.9        | 0.838        | 0.536 – 1.310        | 0.438             |
|                                              |                                                                          | Away from home                       | 85; 163                         | 34.3        | 1.023        | 0.700 – 1.495        | 0.908             |
|                                              |                                                                          | At and away from home                | 77; 151                         | 33.8        | Ref          |                      |                   |
|                                              |                                                                          | Unemployed                           | 6; 4                            | 60.0        | 2.942        | 0.806 – 10.735       | 0.102             |
|                                              |                                                                          | Retired                              | 37; 90                          | 29.1        | 0.806        | 0.503 – 1.291        | 0.370             |
|                                              | Owner lives alone/only adult in the<br>household ( <i>n</i> = 871)       | No                                   | 247; 506                        | 32.8        | Ref          |                      |                   |
|                                              |                                                                          | Yes                                  | 43; 75                          | 36.4        | 1.175        | 0.784 – 1.760        | 0.436             |
| <b>Dog<br/>demographics</b>                  | Dog sex<br>( <i>n</i> = 917)                                             | Female                               | 118; 314                        | 27.3        | Ref          |                      |                   |
|                                              |                                                                          | <b>Male</b>                          | <b>186; 299</b>                 | <b>38.4</b> | <b>1.655</b> | <b>1.251 – 2.190</b> | <b>&lt; 0.001</b> |
|                                              | Neutered<br>( <i>n</i> = 918)                                            | No                                   | 126; 256                        | 33.0        | Ref          |                      |                   |
|                                              |                                                                          | Yes                                  | 178; 358                        | 33.2        | 1.010        | 0.764 – 1.335        | 0.943             |
|                                              | Breed purity designation<br>( <i>n</i> = 918)                            | Crossbred                            | 12; 26                          | 31.6        | Ref          |                      |                   |
|                                              |                                                                          | Purebred                             | 214; 418                        | 33.9        | 1.109        | 0.549 – 2.242        | 0.773             |
|                                              |                                                                          | Designer Crossbred                   | 78; 170                         | 31.5        | 0.994        | 0.477 – 2.072        | 0.987             |
|                                              | Top 12 most common breeds at 21<br>months ( <i>n</i> = 918)              | Crossbred                            | 12; 26                          | 31.6        | Ref          |                      |                   |
|                                              |                                                                          | Cockapoo                             | 35; 53                          | 39.8        | 1.432        | 0.639 – 3.204        | 0.384             |
|                                              |                                                                          | Labradoodle                          | 10; 18                          | 35.7        | 1.204        | 0.429 – 3.379        | 0.725             |
|                                              |                                                                          | Cavapoo                              | 5; 13                           | 27.8        | 0.833        | 0.242 – 2.873        | 0.773             |
|                                              |                                                                          | Labrador Retriever                   | 31; 67                          | 31.6        | 1.002        | 0.448 – 2.244        | 0.995             |
|                                              |                                                                          | Cocker Spaniel                       | 21; 42                          | 33.3        | 1.083        | 0.458 – 2.564        | 0.856             |
|                                              |                                                                          | Border Collie                        | 11; 21                          | 34.4        | 1.135        | 0.418 – 3.085        | 0.804             |
|                                              |                                                                          | Miniature Smooth-Haired<br>Dachshund | 11; 18                          | 37.9        | 1.324        | 0.480 – 3.654        | 0.588             |
|                                              |                                                                          | Border Terrier                       | 8; 18                           | 30.8        | 0.963        | 0.328 – 2.829        | 0.945             |
|                                              |                                                                          | Golden Retriever                     | 12; 16                          | 42.9        | 1.625        | 0.590 – 4.479        | 0.348             |
|                                              |                                                                          | Whippet                              | 6; 16                           | 27.3        | 0.813        | 0.254 – 2.595        | 0.726             |
|                                              |                                                                          | English Springer Spaniel             | 7; 13                           | 35.0        | 1.167        | 0.371 – 3.668        | 0.792             |
|                                              |                                                                          | Other Purebred                       | 135; 293                        | 31.5        | 0.998        | 0.489 – 2.038        | 0.996             |



Table S7. Contd...

|                                                        | Variable                                                      | Category          | <i>n</i> (harder;<br>easier/as) | % (harder)  | Odds Ratio   | 95% CI*              | <i>p</i> -Value   |
|--------------------------------------------------------|---------------------------------------------------------------|-------------------|---------------------------------|-------------|--------------|----------------------|-------------------|
| <b>Dog demographics</b>                                | Breed group<br>( <i>n</i> = 918)                              | Not KC recognised | 94; 200                         | 32.0        |              | Ref                  |                   |
|                                                        |                                                               | Gundog            | 91; 178                         | 33.8        | 1.088        | 0.765 – 1.547        | 0.640             |
|                                                        |                                                               | Hound             | 28; 60                          | 31.8        | 0.993        | 0.596 – 1.655        | 0.978             |
|                                                        |                                                               | Pastoral          | 22; 42                          | 34.4        | 1.114        | 0.630 – 1.973        | 0.710             |
|                                                        |                                                               | Terrier           | 26; 55                          | 32.1        | 1.006        | 0.594 – 1.704        | 0.983             |
|                                                        |                                                               | Toy               | 8; 17                           | 32.0        | 1.001        | 0.417 – 2.403        | 0.998             |
|                                                        |                                                               | Utility           | 24; 39                          | 38.1        | 1.309        | 0.745 – 2.302        | 0.349             |
|                                                        |                                                               | Working           | 11; 23                          | 32.4        | 1.018        | 0.476 – 2.174        | 0.964             |
|                                                        | Typical adult bodyweight<br>( <i>n</i> = 883)                 | ≤ 10 kg           | 61; 117                         | 34.3        | 1.131        | 0.772 – 1.657        | 0.527             |
|                                                        |                                                               | 10 to < 20 kg     | 112; 243                        | 31.5        |              | Ref                  |                   |
|                                                        |                                                               | 20 to < 30 kg     | 67; 137                         | 32.8        | 1.061        | 0.734 – 1.533        | 0.752             |
|                                                        |                                                               | 30 to < 40 kg     | 50; 80                          | 38.5        | 1.356        | 0.893 – 2.060        | 0.154             |
|                                                        |                                                               | ≥ 40 kg           | 7; 9                            | 43.8        | 1.687        | 0.613 – 4.646        | 0.311             |
| <b>Purchase motivations for a dog/for breed chosen</b> | Dog to improve mental health<br>( <i>n</i> = 918)             | No                | 133; 326                        | 29.0        |              | Ref                  |                   |
|                                                        |                                                               | Yes               | <b>171; 62.7</b>                | <b>37.3</b> | <b>1.455</b> | <b>1.104 – 1.919</b> | <b>0.008</b>      |
|                                                        | Breed size suited to my lifestyle<br>( <i>n</i> = 918)        | No                | 100; 189                        | 34.6        |              | Ref                  |                   |
|                                                        |                                                               | Yes               | 204; 425                        | 32.4        | 0.907        | 0.676 – 1.218        | 0.517             |
|                                                        | Breed good with children<br>( <i>n</i> = 918)                 | No                | 175; 328                        | 34.8        |              | Ref                  |                   |
|                                                        |                                                               | Yes               | 129; 286                        | 31.1        | 0.845        | 0.641 – 1.116        | 0.235             |
|                                                        | Breed easy to train<br>( <i>n</i> = 918)                      | No                | 162; 320                        | 33.6        |              | Ref                  |                   |
|                                                        |                                                               | Yes               | 142; 294                        | 32.6        | 0.954        | 0.724 – 1.257        | 0.738             |
|                                                        | Friends or family own this breed/crossbreed ( <i>n</i> = 918) | No                | 231; 470                        | 33.0        |              | Ref                  |                   |
|                                                        |                                                               | Yes               | 73; 144                         | 33.6        | 1.031        | 0.747 – 1.424        | 0.851             |
|                                                        | Respondent driving force to get a dog ( <i>n</i> = 900)       | No                | 167; 361                        | 31.6        |              | Ref                  |                   |
|                                                        |                                                               | Yes               | 132; 240                        | 35.5        | 1.189        | 0.898 – 1.574        | 0.227             |
| <b>Pre-purchase research</b>                           | Research conducted ( <i>n</i> = 916)                          | No                | 96; 286                         | 25.1        |              | Ref                  |                   |
|                                                        |                                                               | Yes               | <b>207; 327</b>                 | <b>38.8</b> | <b>1.886</b> | <b>1.412 – 2.519</b> | <b>&lt; 0.001</b> |
| <b>Purchase behaviours</b>                             | Via animal-specific selling website<br>( <i>n</i> = 917)      | No                | 145; 305                        | 32.2        |              | Ref                  |                   |
|                                                        |                                                               | Yes               | 158; 309                        | 33.8        | 1.076        | 0.817 – 1.417        | 0.604             |
|                                                        | Viewed in person prior to purchase<br>( <i>n</i> = 918)       | No                | 95; 184                         | 34.1        |              | Ref                  |                   |
|                                                        |                                                               | Yes               | 209; 430                        | 32.7        | 0.941        | 0.699 – 1.268        | 0.691             |

Table S7. Contd...

|                                                     | Variable                                   | Category                                   | n (harder;<br>easier/as) | % (harder)  | Odds Ratio   | 95% CI*              | p-Value           |
|-----------------------------------------------------|--------------------------------------------|--------------------------------------------|--------------------------|-------------|--------------|----------------------|-------------------|
| <b>Potentially<br/>illegal sales<br/>indicators</b> | Sold without dam present<br>(n = 916)      | No                                         | 230; 491                 | 31.9        |              | Ref                  |                   |
|                                                     |                                            | Yes                                        | 74; 121                  | 37.9        | 1.306        | 0.940 – 1.814        | 0.112             |
|                                                     | Sold outside breeders' home<br>(n = 918)   | No                                         | 185; 392                 | 32.1        |              | Ref                  |                   |
|                                                     |                                            | Yes                                        | 119; 222                 | 34.9        | 1.136        | 0.856 – 1.508        | 0.378             |
|                                                     | Sold without a microchip (n = 901)         | No                                         | 279; 580                 | 32.5        |              | Ref                  |                   |
|                                                     |                                            | Yes                                        | 19; 23                   | 45.2        | 1.717        | 0.920 – 3.206        | 0.090             |
|                                                     | Sold < 6 weeks of age (n = 917)            | No                                         | 304; 611                 | 33.2        |              | Ref                  |                   |
|                                                     |                                            | Yes                                        | 0; 2                     | 0.0         | ~            | ~                    | ~                 |
| <b>Socialisation<br/>&lt; 16 weeks</b>              | Attended puppy classes<br>(n = 917)        | No                                         | 159; 369                 | 30.1        |              | Ref                  |                   |
|                                                     |                                            | <b>Yes, in person</b>                      | <b>119; 197</b>          | <b>37.3</b> | <b>1.402</b> | <b>1.045 – 1.881</b> | <b>0.024</b>      |
|                                                     |                                            | Yes, online                                | 26; 47                   | 35.6        | 1.284        | 0.768 – 2.146        | 0.341             |
| <b>Adult<br/>management</b>                         | Attended adult classes<br>(n = 918)        | No                                         | 128; 379                 | 25.2        |              | Ref                  |                   |
|                                                     |                                            | <b>Yes, in person</b>                      | <b>159; 216</b>          | <b>42.4</b> | <b>2.180</b> | <b>1.637 – 2.903</b> | <b>&lt; 0.001</b> |
|                                                     |                                            | <b>Yes, online</b>                         | <b>17; 19</b>            | <b>47.2</b> | <b>2.649</b> | <b>1.336 – 5.252</b> | <b>0.005</b>      |
|                                                     |                                            |                                            |                          |             |              |                      |                   |
|                                                     | Owner training method<br>(n = 889)         | Rewards-based only                         | 38; 118                  | 24.4        |              | Ref                  |                   |
|                                                     |                                            | Rewards-based & 1 aversive                 | 56; 132                  | 29.8        | 1.317        | 0.814 – 2.131        | 0.261             |
|                                                     |                                            | <b>Rewards-based &amp; &gt; 1 aversive</b> | <b>206; 339</b>          | <b>37.8</b> | <b>1.887</b> | <b>1.259 – 2.828</b> | <b>0.002</b>      |
|                                                     |                                            | Aversive only                              | 0; 0                     | 0.0         | ~            | ~                    | ~                 |
|                                                     | Exercise frequency (walks)<br>(n = 882)    | Never                                      | 0; 1                     | 0.0         | ~            | ~                    | ~                 |
|                                                     |                                            | < Once a week                              | 1; 2                     | 33.3        | 0.926        | 0.083 – 10.296       | 0.950             |
|                                                     |                                            | Once a week                                | 1; 2                     | 33.3        | 0.926        | 0.083 – 10.296       | 0.950             |
|                                                     |                                            | Several times per week                     | 17; 30                   | 36.2        | 1.049        | 0.559 – 1.968        | 0.882             |
|                                                     |                                            | Once per day                               | 75; 160                  | 31.9        | 0.868        | 0.616 – 1.222        | 0.416             |
|                                                     |                                            | Twice per day                              | 141; 261                 | 35.1        |              | Ref                  |                   |
|                                                     |                                            | > Twice per day                            | 57; 134                  | 29.8        | 0.787        | 0.543 – 1.142        | 0.207             |
|                                                     |                                            |                                            |                          |             |              |                      |                   |
|                                                     | Exercise frequency<br>(off lead) (n = 880) | <b>Never</b>                               | <b>26; 24</b>            | <b>52.0</b> | <b>1.852</b> | <b>1.009 – 3.400</b> | <b>0.047</b>      |
|                                                     |                                            | <b>&lt; Once a week</b>                    | <b>5; 26</b>             | <b>16.1</b> | <b>0.329</b> | <b>0.122 – 0.884</b> | <b>0.027</b>      |
|                                                     |                                            | Once a week                                | 12; 15                   | 44.4        | 1.368        | 0.616 – 3.039        | 0.442             |
|                                                     |                                            | Several times per week                     | 53; 91                   | 36.8        | 0.996        | 0.655 – 1.514        | 0.985             |
|                                                     |                                            | Once per day                               | 100; 171                 | 36.9        |              | Ref                  |                   |
|                                                     |                                            | Twice per day                              | 64; 160                  | 28.6        | 0.684        | 0.467 – 1.001        | 0.051             |
|                                                     |                                            | <b>&gt; Twice per day</b>                  | <b>31; 102</b>           | <b>23.3</b> | <b>0.520</b> | <b>0.324 – 0.833</b> | <b>0.007</b>      |

Table S7. Contd...

|                  | Variable                                                           | Category                                   | n (harder;<br>easier/as) | % (harder)  | Odds Ratio   | 95% CI*              | p-Value           |
|------------------|--------------------------------------------------------------------|--------------------------------------------|--------------------------|-------------|--------------|----------------------|-------------------|
| Adult management | Time left alone (n = 892)                                          | Never                                      | 43; 62                   | 41.0        |              | Ref                  |                   |
|                  |                                                                    | Up to 1 hour                               | 60; 999                  | 37.7        | 0.874        | 0.528 – 1.447        | 0.600             |
|                  |                                                                    | <b>1 to 4 hours</b>                        | <b>150; 366</b>          | <b>29.1</b> | <b>0.591</b> | <b>0.383 – 0.911</b> | <b>0.017</b>      |
|                  |                                                                    | Over 4 hours                               | 41; 71                   | 36.6        | 0.833        | 0.482 – 1.439        | 0.512             |
|                  | Change in time left alone from<br>< 16 weeks (n = 862)             | Same amount of time                        | 108; 251                 | 30.1        |              | Ref                  |                   |
|                  |                                                                    | Less time                                  | 11; 16                   | 40.7        | 1.598        | 0.718 – 3.556        | 0.251             |
|                  |                                                                    | More time ≤ 4 hours                        | 123; 251                 | 32.9        | 1.139        | 0.834 – 1.556        | 0.414             |
|                  |                                                                    | <b>More time &gt; 4 hours</b>              | <b>46; 56</b>            | <b>45.1</b> | <b>1.909</b> | <b>1.217 – 2.996</b> | <b>0.005</b>      |
|                  | Location left alone<br>(n = 855)                                   | <b>A crate/indoor kennel (door closed)</b> | <b>56; 77</b>            | <b>42.1</b> | <b>1.581</b> | <b>1.065 – 2.346</b> | <b>0.023</b>      |
|                  |                                                                    | Loose in a single room                     | 74; 169                  | 30.5        | 0.952        | 0.681 – 1.330        | 0.772             |
|                  |                                                                    | Loose in multiple rooms                    | 150; 326                 | 31.5        |              | Ref                  |                   |
|                  |                                                                    | Outdoor kennel (door closed)               | 0; 1                     | 0.0         | ~            | ~                    | ~                 |
|                  |                                                                    | Outdoor kennel (door open)                 | 0; 1                     | 0.0         | ~            | ~                    | ~                 |
|                  |                                                                    | Loose in an enclosed outdoor space         | 0; 1                     | 0.0         | ~            | ~                    | ~                 |
|                  | General advice source for training<br>and behaviour (n = 886)      | Non-professional                           | 44; 219                  | 16.7        |              | Ref                  |                   |
|                  |                                                                    | <b>Professional</b>                        | <b>252; 371</b>          | <b>40.4</b> | <b>3.381</b> | <b>2.356 – 4.851</b> | <b>&lt; 0.001</b> |
|                  | Respondent primary carer for dog<br>(n = 917)                      | Shares care                                | 129; 269                 | 32.4        |              | Ref                  |                   |
|                  |                                                                    | No                                         | 2; 2                     | 50.0        | 2.085        | 0.290 – 14.970       | 0.465             |
|                  |                                                                    | Yes                                        | 172; 343                 | 33.4        | 1.046        | 0.791 – 1.382        | 0.753             |
| Dog behaviour    | Total number of owner-reported<br>undesirable behaviours (n = 784) | /                                          | /                        | /           | <b>1.301</b> | <b>1.230 – 1.377</b> | <b>&lt; 0.001</b> |
|                  |                                                                    | /                                          | /                        | /           |              |                      |                   |
|                  | Control behaviour score<br>(n = 876)                               | 0                                          | 23; 115                  | 16.7        |              | Ref                  |                   |
|                  |                                                                    | <b>1+</b>                                  | <b>269; 469</b>          | <b>36.4</b> | <b>2.868</b> | <b>1.789 – 4.598</b> | <b>&lt; 0.001</b> |
|                  | Attention seeking behaviour score<br>(n = 834)                     | 0                                          | 30; 159                  | 15.9        |              | Ref                  |                   |
|                  |                                                                    | <b>1+</b>                                  | <b>248; 397</b>          | <b>38.4</b> | <b>3.311</b> | <b>2.173 – 5.045</b> | <b>&lt; 0.001</b> |
|                  | Aggressive behaviour score<br>(n = 888)                            | 0                                          | 186; 480                 | 27.9        |              | Ref                  |                   |
|                  |                                                                    | <b>1+</b>                                  | <b>106; 116</b>          | <b>47.7</b> | <b>2.358</b> | <b>1.724 – 3.225</b> | <b>&lt; 0.001</b> |
|                  | Fear/avoidance behaviour score<br>(n = 883)                        | 0                                          | 137; 379                 | 26.6        |              | Ref                  |                   |
|                  |                                                                    | <b>1+</b>                                  | <b>157; 210</b>          | <b>42.8</b> | <b>2.068</b> | <b>1.556 – 2.749</b> | <b>&lt; 0.001</b> |
|                  | Reaction to familiar people<br>(n = 890)                           | 0                                          | 260; 578                 | 31.0        |              | Ref                  |                   |
|                  |                                                                    | <b>1+</b>                                  | <b>35; 17</b>            | <b>67.3</b> | <b>4.577</b> | <b>2.518 – 8.320</b> | <b>&lt; 0.001</b> |
|                  | Reaction to unfamiliar people<br>(n = 894)                         | 0                                          | 215; 491                 | 30.5        |              | Ref                  |                   |
|                  |                                                                    | <b>1+</b>                                  | <b>80; 108</b>           | <b>42.6</b> | <b>1.692</b> | <b>1.215 – 2.354</b> | <b>0.002</b>      |

Table S7. Contd...

|               | Variable                                    | Category | <i>n</i> (harder;<br>easier/as) | % (harder) | Odds Ratio | 95% CI*       | <i>p</i> -Value |
|---------------|---------------------------------------------|----------|---------------------------------|------------|------------|---------------|-----------------|
| Dog behaviour | Reaction to other dogs<br>( <i>n</i> = 891) | 0        | 197; 501                        | 28.2       |            | Ref           |                 |
|               |                                             | 1+       | 98; 95                          | 50.8       | 2.623      | 1.892 – 3.638 | < 0.001         |
|               | SRB case<br>( <i>n</i> = 786)               | No       | 150; 392                        | 27.7       |            | Ref           |                 |
|               |                                             | Yes      | 99; 145                         | 40.6       | 1.784      | 1.299 – 2.451 | < 0.001         |
